# ASpli2: Integrative analysis of splicing landscapes through RNA-Seq assays

Estefania Mancini<sup>1</sup>, Andres Rabinovich<sup>1</sup>, Javier Iserte, Marcelo Yanovsky\*,  
Ariel Chernomoretz\*

*Buenos Aires, Argentina*

---

## Abstract

Genome-wide analysis of alternative splicing has been a very active field of research since the early days of NGS (Next generation sequencing) technologies. Since then, ever-growing data availability and the development of increasingly sophisticated analysis methods have uncovered the complexity of the general splicing repertoire. However, independently of the considered quantification methodology, very often changes in variant concentration profiles can be hard to disentangle. In order to tackle this problem we present ASpli2, a computational suite implemented in R, that allows the identification of changes in both, annotated and novel alternative splicing events, and can deal with complex experimental designs.

Our analysis workflow relies on the analysis of differential usage of sub-genic features in combination with a junction-based description of local splicing changes. Analyzing simulated and real data we found that the consolidation of these signals resulted in a robust proxy of the occurrence of splicing alterations. While junction-based signals allowed us to uncover annotated

---

\*Corresponding author

<sup>1</sup>Equally contributed

as well and non-annotated events, bin-associated signals notably increased recall capabilities at a very competitive performance in terms of precision.

*Keywords:* Alternative splicing, RNAseq,

---

## 1 **1. Introduction**

2       The vast majority of protein coding genes in eukaryotic organisms are  
3 transcribed into precursor RNA messenger molecules (pre-mRNA) carrying  
4 protein coding regions (exons) interleaved by non-coding ones (introns). The  
5 later are removed in a co-transcriptional dynamical maturation process called  
6 splicing. Alternative splicing (AS) occurs whenever distinct splicing sites are  
7 selected in this process resulting in different mature mRNA molecules [1, 2].

8       Far from being an exception, it was found that AS is a rather common  
9 mechanism of gene regulation that serves to expand the functional diversity  
10 of a single gene allowing the generation of multiple mRNA isoforms from a  
11 single genomic locus [3]. Five basic modes of AS are generally recognized: the  
12 skipping of a given exon (exon skipping, ES), the exon elongation/contrac-  
13 tion produced by the use of alternative 5' donor (Alt5') or 3' acceptor (Alt3')  
14 sites respectively, the retention of an intronic stretch in the mature mRNA  
15 form (intron retention IR), and the alternative use of mutually exclusive ex-  
16 ons (MEX). These canonical forms of AS are prevalent among eukaryotes,  
17 although their relative incidence might vary between them [4]. Despite their  
18 ubiquity, these simple patterns that mainly involve binary choices of exons,  
19 donor and acceptor sites, do not exhaust the splicing repertoire. On the con-  
20 trary, much more complex biologically relevant patterns could arise [5, 6]. In  
21 practice the study of AS faces many technical challenges that cause that every

22 quantitative approach typically suffers methodological limitations. Despite  
23 the use of different statistical approaches, some methods consider only pre-  
24 existing known annotation, some can exclusively handle canonical splicing  
25 events and some can only handle pairwise comparisons between conditions  
26 (for a comprehensive review see [7, 8, 9]).

27

28 The analysis of AS at genomic scale started-in with microarray technolo-  
29 gies [10, 11] and nowadays is routinely probed using RNAseq assays [12, 13].  
30 Roughly speaking, there are three main computational approaches to study  
31 splicing diversity from RNAseq data. For one hand there are transcript re-  
32 construction methods, like MISO [14] or Cufflink [15] that aim to infer a  
33 probabilistic model of the frequency of each isoform from the read distribu-  
34 tion mapped to a given gene. In the same spirit, Kallisto [16] and Salmon[17]  
35 are two recently introduced methods that leverage on light-weight pseudo-  
36 alignment heuristics to quantify transcript abundances. For the other hand,  
37 methods like DEXSeq [18] , edgeR [19, 20], or voom-limma [21], focus on  
38 the analysis of differential usage of subgenic features (e.g. exons) between  
39 conditions. Finally, there are also methods like rMATS [22], MAJIQ [5] or  
40 LeafCutter [23] that leverage on junction information to infer both, anno-  
41 tated and novel splicing events.

42

43 Differently from other approaches, ASpli2 was specifically designed to in-  
44 tegrate several independent signals in order to deal with the complexity that  
45 might arise in splicing patterns. Taking into account genome annotation in-  
46 formation, ASpli2 considers bin-based signals along with junction inclusion

47 indexes in order to assess for statistically significant changes in read cover-  
48 age. In addition, annotation-independent signals are estimated based on the  
49 complete set of experimentally detected splice junctions. Noticeably, ASpli2  
50 can provide a comprehensive description of genome-wide splicing alterations  
51 even for non-trivial experimental designs. Our approach relies on a gener-  
52 alized linear model framework (as implemented in edgeR R-package [24]) to  
53 assess for the statistical analysis of specific contrasts of interest.

54 In order to weigh ASpli2's performance we compared it against three  
55 different state-of-the-art methodologies: rMATS [22], LeafCutter [23] and  
56 MAJIQ [5]. The first one is a widely used piece of software that can in-  
57 tegrate coverage and junction information to assess for changes in splicing  
58 patterns. Additionally, LeafCutter and MAJIQ are two recently introduced  
59 methodologies that are widely used by the bioinformatics community. Both  
60 approaches focus on the analysis of clusters of junctions to study local splic-  
61 ing patterns of varying complexity. However, they differ in many technical  
62 and statistical aspects [5]. For instance, LeafCutter was not designed to han-  
63 dle intron retention events and considers a Dirichlet-multinomial generalized  
64 linear model to test for differential intron excision between two groups of  
65 samples. MAJIQ, on the other hand, relies on a bayesian estimation of the  
66 posterior Percent Selected Index to identify splicing affected junctions.

67 Other methodolgies like DEXSeq [18], edgeR [24], or voom [21] are also  
68 widely considered for bioinformatics analysis as they are very versatile tools  
69 to analyse differential usage of exons from RNA-seq data. In fact, ASpli2  
70 makes use of the genome-binning scheme originally presented in DEXseq to  
71 quantify read coverage signals (see Sup.Mat.8.1) and leverages on the statis-

72 tical framework developed in edgeR to estimate robust splicing signals (see  
73 Section 3.1). These methodologies constitute great toolboxes to implement  
74 ad-hoc analysis. However, as they do not intend to provide *per se* self-  
75 contained solutions that produces final reports starting from read-alignment  
76 input data they were not explicitly included in our analysis.

77 The paper is organized as follows. In Section 2.2 we analyzed a simu-  
78 lated dataset in order to evaluate the specificity and sensitivity of ASpli2  
79 discoveries. These results were contrasted against LeafCutter, MAJIQ and  
80 rMATS outcomes in order to analyse ASpli2 performance. In Section 2.3 we  
81 explored the ability of ASpli2 to uncover consistent splicing-patterns from  
82 two independent RNAseq assays that probed the same biology. We focused  
83 on the alterations of splicing patterns of *A. thaliana* transcriptome caused  
84 by the knock out of PRMT5, a methyl transferase that, among other pro-  
85 teins, targets several Sm spliceosomal proteins [25, 26, 27]. This analysis was  
86 also performed with the other considered methodologies in order to compare  
87 their capacity to generate reproducible results. In addition, we capitalized on  
88 ASpli2's ability to handle complex experimental designs to produce a consol-  
89 idated data-set from the independent assays. In this section we also aimed to  
90 quantify the level of agreement of ASpli2, LeafCutter, MAJIQ and rMATS  
91 discoveries with qRT-PCR based alternative splicing evidence. To that end,  
92 we took advantage of two independent studies that analyzed splicing altered  
93 events in PRMT5 mutants using qRT-PCR assays [25, 28]. Finally, in Sec-  
94 tion 2.4, we considered a 28 samples paired-study of human prostate cancer  
95 [29]. Using this data-set we analyzed how the performance, time and memory  
96 requirements scaled with the number of considered samples in a paired exper-

97 imental design. Finally, we discussed our results in Section 4 and presented  
98 our conclusions in Section 5.

## 99 **2. Results**

### 100 *2.1. ASpli2 workflow*

101 ASpli2 was designed as a flexible R package to carry out all the major  
102 tasks required for gene expression and splicing analysis. A typical ASpli2  
103 workflow involves: parsing the genome annotation into subgenic features  
104 called bins, overlapping read alignments against them, perform junction  
105 counting, fulfill inference tasks of differential bin and junction usage and,  
106 finally, report integrated splicing signals. A workflow diagram and a sum-  
107 mary of ASpli2 core functionality can be found as Supplementary Figures S1  
108 and S2 respectively. As shown in Figure S1, at every step ASpli2 generates  
109 self-contained outcomes that, if required, can be easily exported and inte-  
110 grated into other processing pipelines. Supplementary Figure S3 shows an  
111 example of the interactive html report generated as a final output. A detailed  
112 description of ASpli2 functionality is included in ASpli2's R vignette, which  
113 is provided as Supplementary Material.

114

### 115 *2.2. Synthetic dataset*

116 Changes in splicing patterns were simulated in a treatment vs control  
117 setup for genes of the chromosome-one of the *Arabidopsis thaliana* plant  
118 genome (three samples per condition). In our simulations, the differential

119 usage of splicing variants affected 2451 genomic bins in 915 genes (see Ma-  
120 terial and Methods 3.3).

121

122 The ASpli2 analysis pipeline provided three different cues to probe splic-  
123 ing occurrence. Statistically significant evidence is collected from: bin cov-  
124 erage differential signals, junction anchorage changes and variations inside  
125 junction clusters (see Material and Methods 3.1). We considered bin-coverage  
126 signals with statistically significant differential coverage changes ( $\text{fdr} < 0.05$ )  
127 that presented either a larger than three-fold coverage fold-change or, alter-  
128 natively, a change in bin-supporting junction inclusion indices larger than 0.2  
129 . For junction based signals, on the other hand, locale and anchorage indices  
130 were required to present statistically significant changes ( $\text{fdr} < 0.01$ ) and also  
131 should display usage signal variations larger than a 0.3 level (see Material  
132 and Methods 3.2)

133

134 In Table 1 we reported the number of correctly detected simulated events,  
135 number of false positives and number of events exclusively detected by each  
136 kind of signal: bin-coverage, junction-locale and junction-anchorage. Over-  
137 laps between discoveries reported by each kind of signal were graphically  
138 reported in panel (A) of Figure 1.

139 It can be seen that ASpli2 correctly uncovered 974 (40%) of the 2451  
140 simulated bin events. Moreover, we found that most of the ASpli2 undetected  
141 simulated events (1341 out of 1477) took place in genes that did not present  
142 enough expression levels over the analysed conditions and therefore were  
143 filtered out before any statistical testing (see 3.2). In fact, only 136 out of

144 the 1110 events (12%) that did pass the gene-expression pre-filtering step  
145 were found to be false negative cases.

146 About 95% of ASpli2 true discoveries were identified by the analysis of  
147 significant changes at the bin-coverage level. Junction-based detection, on  
148 the other hand, could correctly identified 574 simulated events (60% of true  
149 discoveries). The null overlap between locale and anchorage detection illus-  
150 trated that they probed complementary aspects of splicing events. Addi-  
151 tionally, it can be appreciated that 41% (399) of the true discoveries were  
152 only detected by bin-coverage signals, whereas junction-based analysis con-  
153 tributed only 5% (50) of specific detections. A graphical summary of the  
154 detection signal landscape can be appreciated in panel (A) of Figure 1.

155

| ASpli2 signal      | TP        | FP |
|--------------------|-----------|----|
| bin coverage       | 924 (399) | 42 |
| junction locale    | 393 (35)  | 2  |
| junction anchorage | 182 (15)  | 6  |
| overall            | 974       | 48 |

Table (1) Splicing detection performance of the three different ASpli2 signals. True positive and false positive calls are shown in the second and third columns respectively. The number of specific discoveries exclusively reported by each signal is reported between brackets.

156 We decided to further characterized some aspects of bin-coverage detec-  
157 tion calls, as this signal provided the major number of discoveries. It can be  
158 seen in panel-(B) of Figure 1 that fold-change and junction-support signals



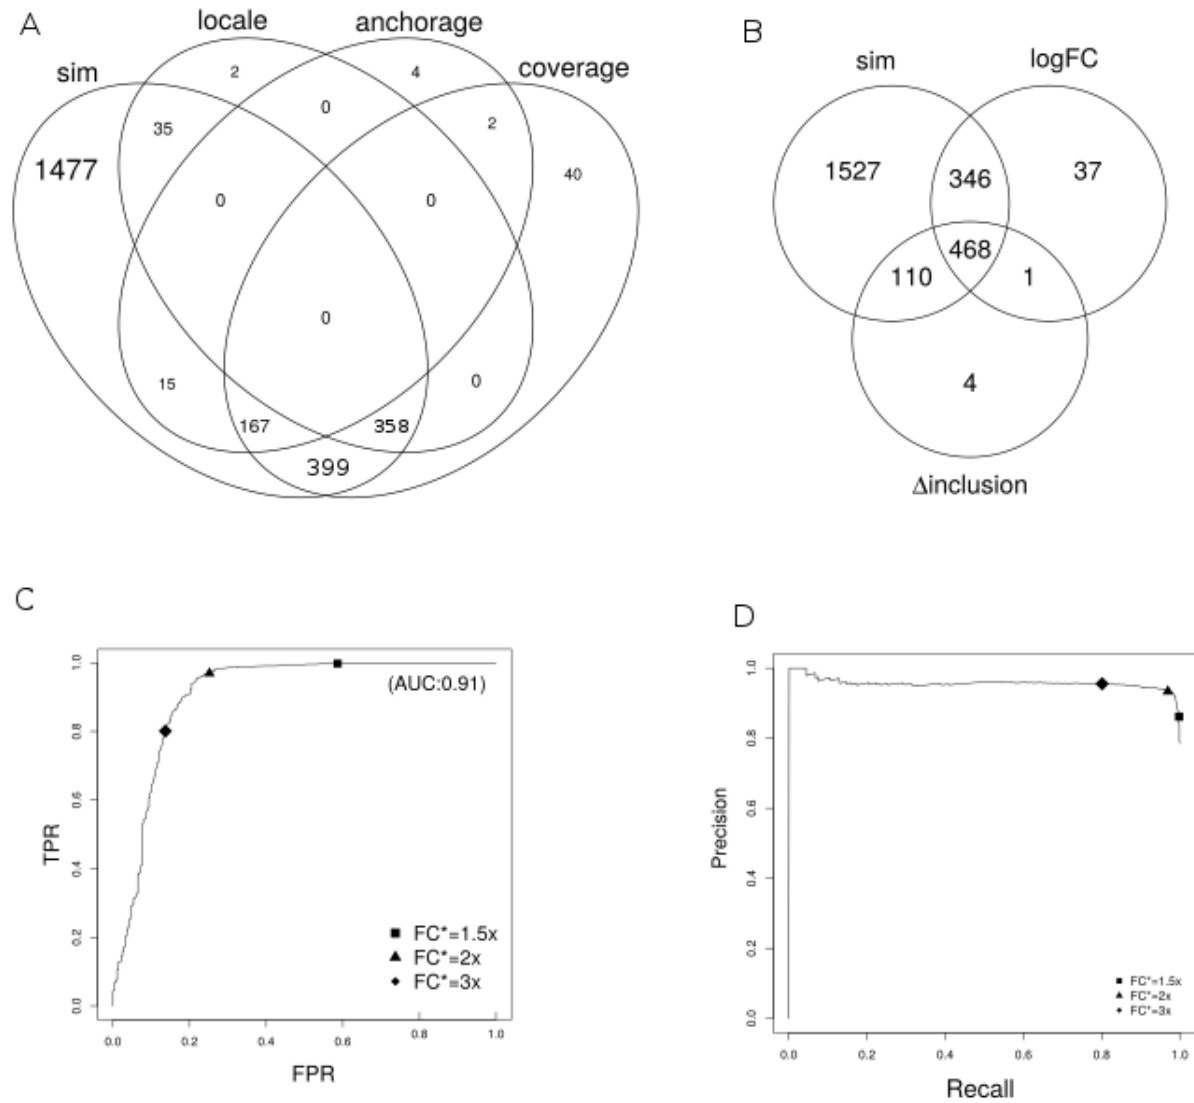

Figure 1 (a) Distribution of detection call produced by different ASpli2 signals. (b) Graphical summary of bin-coverage detection calls. The *sim* set correspond to simulated events. *logFC* and *D-inclusion* sets are associated to statistically significant discoveries presenting large enough fold change and large bin-supporting junction inclusion signals respectively. ROC and Precision-Recall curves, parameterized by the considered fold-change threshold level, are shown for statistically significant bins in panels (c) and (d) respectively.

159 used in the bin-coverage analysis reported relevant and non-redundant infor-  
160 mation. Whereas the first one accounted for 37% of true positive instances  
161 exclusively detected by this signal, the second one accounted for the specific  
162 identification of 12% of the total number of true events. The impact of the  
163 selected fold-change threshold value,  $FC^*$ , on specificity, precision and recall  
164 can be appreciated with the aid of the Receiver-Operator and Precision-  
165 Recall curves shown in panels (C) and (D) of Figure 1. It can be recognized  
166 from these figures that with the adopted 3-fold threshold ASpli2 achieved  
167 high recall and precision levels ( $\sim 80\%$  and  $\sim 95\%$  respectively) laying at  
168 rather moderate levels of false positive rates ( $\sim 14\%$ ).

169

| method              | size       | precision   | recall      |
|---------------------|------------|-------------|-------------|
| ASpli2              | 1022 (631) | 0.95 (0.99) | 0.40 (0.68) |
| ASpli2 <sub>c</sub> | 966 (591)  | 0.96 (0.99) | 0.38 (0.64) |
| ASpli2 <sub>j</sub> | 583 (456)  | 0.99 (0.99) | 0.23 (0.50) |
| LeafCutter          | 204 (163)  | 0.93 (0.91) | 0.08 (0.16) |
| MAJIQ               | 538 (381)  | 0.84 (0.87) | 0.18 (0.36) |
| rMATS               | 405 (352)  | 0.87 (0.91) | 0.14 (0.35) |

Table (2) Number of discoveries, precision and recall levels are reported for different detection methodologies. *ASpli<sub>c</sub>* and *ASpli<sub>j</sub>* correspond to ASpli2 discoveries detected using just coverage or just junction signals respectively. Values between parenthesis report quantities estimated at gene-level.

170 In Table 2 we reported the detection performance of ASpli2 and the re-  
171 sults obtained by other state-of-the-art algorithms (see Sup Mat 8.2 and 8.3

172 for calculation details). Precision and recall values estimated at gene-level (in  
173 which a gene was reported as a discovery whenever at least one alternative-  
174 splicing event was detected within its genomic range) were reported between  
175 parenthesis. ASpli2 outcomes considering only coverage signal or just junc-  
176 tion signals were included in the table as ASpli2<sub>c</sub> and ASpli2<sub>j</sub> rows respec-  
177 tively.

178 It can be seen from the table that even though all tested algorithm shown  
179 rather high precision values, ASpli2 benefited from larger recall scores than  
180 any other methodology. Moreover, it can be appreciated that ASpli2<sub>j</sub> dis-  
181 played only marginally larger recall levels than other methodologies implying  
182 that ASpli2 leveraged on coverage signals to increase this figure of merit. All  
183 of these results suggested that ASpli2 was capable of reliably detect the simu-  
184 lated splicing events achieving notably high recall values at very competitive  
185 levels of precision and specificity.

### 186 2.3. Reproducibility Analysis

187 As we mentioned in the introduction, PRMT5 is a methyl transferase  
188 that, among other proteins, targets several spliceosome proteins. Its deletion  
189 has been proved to provoke major splicing alterations [25, 26]. We analyzed  
190 two independent RNAseq assays that were conducted at different times prob-  
191 ing the same biology. Experiments *A* (GSE149429) and *B* (GSE149430) were  
192 originally carried out to analyze splicing alterations in the PRMT5 knock-  
193 out mutant in *Arabidopsis thaliana*. Both assays probed the PRMT5-KO  
194 and wild-type transcriptomes in Columbia ecotype plants as part of larger  
195 and different studies (see Material and Methods 3.4).

196 The rationale behind our analysis was two-fold. For one hand we wanted

197 to assess for ASpli2 detection performance in a more realistic setup. For  
198 the other we wanted to take advantage of these datasets to quantitatively  
199 estimate the reproducibility of discoveries, i.e. we wanted to explore the  
200 consistency and robustness of experimentally identified alternatively splicing  
201 events in biologically related systems.

### 202 *2.3.1. Reproducibility assessment*

203 We analyzed RNAseq assays *A* and *B* with ASpli2 and the other consid-  
204 ered algorithms. For ASpli2, we used the same detection-call criteria specified  
205 in Section 2.2. Default parameters were considered to run the other tested  
206 methodologies (command lines used to execute them were included as Sup-  
207plementary Material 8.2). For LeafCutter and rMATS we considered events  
208 presenting fdr corrected pvalues smaller than 0.05 and changes in junction  
209 inclusion indices larger than 0.1. For MAJIQ we sought for events present-  
210ing a posterior probability larger than 0.95, of having a change in inclusion  
211index larger than a 0.2 level. Overall, 6350, 951, 412 and 158 genomic regions  
212affected by altered splicing patterns were reported by ASpli2, LeafCutter,  
213MAJIQ and rMATS algorithms respectively in at least one experiment.

214

215 In Table 3 we summarized reproducibility statistics for each examined  
216 methodology (a more in-depth comparison of discoveries was included as sup-  
217plementary material in Section 8.5). Column *universe* of Table 3 reports the  
218 actual number of sub-genic regions that, upon passing different pre-filtering  
219 steps, were actually examined for statistically significant changes in splicing  
220 patterns. The extent of this background list was noticeably larger for ASpli2  
221 as our methodology tested not only junction-related signals but also alter-

222 ations in the usage of genomic bins. Columns  $A$  and  $B$  outline the number  
 223 of regions reported as differentially spliced in each experiment and column  
 224  $A \cap B$ , the discovery intersection size (i.e. number of sub-genic regions re-  
 225 ported as differentially spliced in both data-sets). In parenthesis, we included  
 226 the *overlap coefficient value*, defined as  $A \cap B / \min(A, B)$ . Expected over-  
 227 laps, fold enrichment (i.e. ratio between observed and expected overlaps)  
 228 and p-values were estimated using the SuperExactTest R-package [30] and  
 229 reported in  $EO$ ,  $FE$  and  $pval$  columns respectively.

| Method     | universe | A    | B    | $A \cap B$  | EO    | FE   | pval     |
|------------|----------|------|------|-------------|-------|------|----------|
| ASpli2     | 140191   | 4687 | 3904 | 2241 (0.57) | 130.5 | 17.2 | 0.0e+00  |
| leafCutter | 8113     | 603  | 675  | 327 (0.54)  | 50.2  | 6.5  | 3.6e-219 |
| MAJIQ      | 16441    | 277  | 284  | 149 (0.54)  | 4.8   | 31.1 | 9.5e-203 |
| rMATS      | 2405     | 310  | 401  | 310 (1.00)  | 19.4  | 16.0 | 0.0e+00  |

Table (3) Reproducibility statistics. The numbers of statistically analyzed genes (after prefiltering steps) for each algorithms are shown in the *universe* column. The number of splicing events reported for each experiment and the number of concordant discoveries are displayed at columns  $A$ ,  $B$ , and  $A \cap B$  respectively. The expected overlap, fold enrichment level and significance pvalue are displayed in columns EO, FE and pval respectively

230 It can be seen from Table 3 that, for all the examined methods, the  
 231 agreement between experiments was highly significant. In all cases, more  
 232 than 50% of events detected in one experimental instance was also reported  
 233 in the other. At the same time it can be appreciated that ASpli2 provided  
 234 the largest (and highly significant) overlap-set. Noticeably, the total number  
 235 of concordant splicing-affected genomic regions detected by ASpli2 presented

236 up to a 15-fold increase with respect to the size of concordant sets reported  
237 by others methodologies.

238

239 Overall our analysis showed that results obtained at different and inde-  
240 pendent experimental instances were reproducible, in the sense that statis-  
241 tically significant agreement was found for every methodology. These re-  
242 sults were robust against using different overlap quantification criteria (see  
243 Sup.Mat 8.5). In this matter, and similarly to the results obtained on the  
244 synthetic dataset, our results on PRMT5 data showed that ASpli2 displayed  
245 high recall levels providing the largest list of concordant discoveries between  
246 experiments.

### 247 *2.3.2. Data consolidation*

248 Up to now, we focused on the analysis of the intersection of set of discov-  
249 eries as a measure of coherence of the results. Now we wanted to illustrate  
250 how ASpli2 capabilities to deal with complex experimental designs can be  
251 used to integrate experimental results in a more statistically sound way.

ASpli2 was used to consolidate datasets A and B considering a simple  
generalized linear model:

$$y \sim \textit{experiment} + \textit{genotype} + \textit{experiment} : \textit{genotype} \quad (1)$$

252 ‘experiment’ was a fixed effect to cope with specific technical biases, and the  
253 ‘genotype’ factor was meant to capture the PRMT5 vs wild-type effect. The  
254 third term was an interaction term, and was used to enforced the exclusion  
255 of non-coherent signals between experiments.

256 ASpli2 detected 4360 genomic regions displaying strong evidence of a

257 genotype effect ( $\text{fdr} < 0.05$ ). In addition, 99% of these PRMT5-related  
258 events (4314 out of 4360) passed a filtering step to enforce they presented no-  
259 detectable evidence of experiment-genotype interactions (experiment:genotype  
260 associated  $\text{fdr} > 0.5$ ). These 4314 events defined the consolidated AB data  
261 set.

262 We found that 99% (2209 out of 2241) of the concordant discoveries in-  
263 dependently detected in both assays were also included in the consolidated  
264 dataset (we included a Venn diagram of the discoveries reported for experi-  
265 ments A, B, and the consolidated data-set AB in Sup.Fig. S7). Noticeably,  
266 the consideration of the AB data-set allowed to almost double the number of  
267 detected genomic regions displaying robust evidence of differential splicing  
268 patterns.

### 269 2.3.3. PRMT5 RT-PCR detected events

270 The PRMT5 methyltransferase has been the target of many studies as  
271 deficiencies in this protein causes genomewide splicing alterations[26, 27, 28].  
272 In this section we focused on two specific works that provided independent  
273 RT-PCR validated lists of splicing alterations linked to PRMT5 in *Arabidop-*  
274 *sis thaliana* [25, 28].

275 For one hand, Deng and collaborators studied PRMT5 mutant *Ara-*  
276 *bidospis thaliana* plants and presented a list of 12 RT-PCR validated intron  
277 retention events (see Fig 2 in [28]). On the other, using the same biological  
278 model, Sanchez and collaborators indentified changes in alternative splicing  
279 using a high-resolution qRTPCR panel that included several known alterna-  
280 tive splicing events [31]. They found that PRMT5 mutants had significant  
281 alterations in 44 events which included exon skipping, alternative donor and

282 acceptor splice sites, as well as intron retention events (Supplementary Table  
283 4 in [25]).

284 We aimed to contrast these findings with the results reported by the dif-  
285 ferent methodologies on datasets A and B. In Table 4 we summarized, for  
286 each study, the number of concordant findings uncovered by different al-  
287 gorithms on datasets A and B. Quantities between brackets represent the  
288 number of ASpli2 discoveries reported by coverage and junction-based sig-  
289 nals respectively. It can be seen that ASpli2 recovered the largest number  
290 of events and that the majority of ASpli2 validated discoveries originated in  
291 differential coverage signal calls. Had we only considered junction related  
292 detection-signals, ASpli2 would have achieved similar levels of agreement  
293 than the other junction-based algorithms (for instance we got a similar per-  
294 formance than LeafCutter on Sanchez data-set for the consolidated case).

295

296 In Table S2, included as supplementary material, we further character-  
297 ized the agreement between the 23 splicing events that ASpli2 uncovered for  
298 the consolidated AB case, and Sanchez qRT-PCR validated events. It can  
299 be seen that in 15 out of the 23 cases (65%), the very genomic region probed  
300 by the PCR analysis was recognized by ASpli2. For the other 8 cases, AS-  
301 pli2 detected actually occurring changes in isoform usage but from splicing  
302 signals originating at genomic locations not probed by the PCR primers (See  
303 Supplementary Figures - TODO: ACA VAN SAHIMI PLOT DE EVENTOS  
304 PCR).



| Method     |    | Deng 2010 | Sanchez 2010 |
|------------|----|-----------|--------------|
| RT-PCR     |    | 12        | 44           |
| ASpli2     | AB | 8 [8,4]   | 23 [21,13]   |
|            | A  | 10 [8,5]  | 24 [19,7]    |
|            | B  | 9 [8,2]   | 20 [18,6]    |
| LeafCutter | A  | 3         | 16           |
|            | B  | 3         | 17           |
| MAJIQ      | A  | 5         | 8            |
|            | B  | 2         | 8            |
| rMATS      | A  | 1         | 12           |
|            | B  | 1         | 3            |

Table (4)

305 *2.4. ASpli2 scalability analysis*

306 In this section we leveraged on a mid-size RNAseq study presented by  
307 Ren and collaborators to characterize aberrant splicing patterns occurring  
308 in prostate cancer patients [29]. We aimed to analyze this sample-paired  
309 assay to see how ASpli2 performance (statistical power, precision, time and  
310 memory requirements) scaled with the number of samples. In particular, we  
311 followed the approach suggested in [32] to characterize ASpli2 in terms of  
312 statistical power and expected false discovery rate for a varying number of  
313 samples.

314 *2.4.1. Statistical power*

315 Ren and collaborators presented a comprehensive study of splicing alter-  
316 ations detected using RNAseq transcriptome profiles of 14 primary prostate  
317 cancers and their paired normal counterparts from the Chinese population  
318 [29]. On average, the 28 fastq files presented  $34.6 \pm 1.7$  million reads per  
319 sample and  $31.4 \pm 1.6$  millions of them were actually mapped to the EN-  
320 SEMBL HG38.98 version of the human genome (see Material and Methods  
321 3.6). The genome's GTF and BAMs files were then used as inputs to drive  
322 an alternative splicing paired-sample analysis with ASpli2. We considered  
323 the following model to identify genomic regions differentially spliced in tumor  
324 samples compared to normal tissue controls:

$$y \sim \textit{patient} + \textit{tissue} \quad (2)$$

325 The 'patient' term served to pair tumor and normal tissue samples coming  
326 from the same individual. The two-level 'tissue' factor reported average  
327 differences between tumor and normal cases over the observed population of  
328 patients.

329 In order to study the dependency of the statistical power on the number  
330 of samples, we sampled without replacement (10 times) subsets of 3, 5, 7 and  
331 10 individuals. For each case, we reported, in the first column of Table 5, the  
332 median (and standard error, in brackets) of the number of genomic regions  
333 found to be alternatively spliced between tumor and normal samples.

334 In order to estimate false discovery rates we considered mock comparisons  
335 between normal samples (we sampled 10 times normal tissue samples of 3vs3,  
336 5vs5 and 7vs7 individuals). We then estimated FDR as the ratio between

337 the number of mock discoveries and the median number of discoveries found  
338 in true comparisons of the same number of samples. In the second column  
339 of Table 5 median and standard errors (in brackets) were reported.

| Samples | Splicing events |              | Affected genes |                |
|---------|-----------------|--------------|----------------|----------------|
|         | number          | FDR          | number         | FDR            |
| 3x3     | 67 (155)        | 0.2 (0.4)    | 44 (113)       | 0.25 (0.03)    |
| 5x5     | 486 (387)       | 0.02 (0.002) | 371 (218)      | 0.02 (0.002)   |
| 7x7     | 759 (220)       | 0.005 (0.02) | 481 (131)      | 0.004 (0.0007) |
| 10x10   | 850 (418)       | -            | 664 (191)      | -              |
| 14x14   | 1465            | -            | 1030           | -              |

Table (5) Summary of the 10-fold bootstrapped analysis of ASpli2 performance on the prostate cancer data set. For each number of paired samples (first column) the median number of genomic-regions displaying a statistically significant ‘tissue’ effect were included in the second column. Median values of false discovery rate estimations obtained from the analysis of normal-tissue samples were shown in the third column. Standard error estimation were reported between brackets.

340 It can be seen from Table 5 that the median number of detected splicing  
341 events increased with the number of examined samples, up to a maximum of  
342 1465 events obtained when the 28 paired samples were considered. The large  
343 variability observed between bootstrap realizations was consistent with the  
344 large variability already observed across prostate cancer transcriptomes (see  
345 [29] and Supplementary Material 8.7). FDR estimated values showed a huge  
346 decrease with increasing number of samples, and for the 5x5 case seemed to  
347 have already leveled off. Similar trends were observed when splicing alter-

348 ations were reported at the level of hosting genes (data not shown).

#### 349 2.4.2. Time and memory requirements

350 In Table 6 we reported median values and standard errors for the elapsed  
351 time and peak memory usage required for calculations (performed on single  
352 thread on an Intel Xeon Silver 4116 2.1GHz Lenovo ThinkSystem SR650)

| Samples | time [min] | memory peak[Gb] |
|---------|------------|-----------------|
| 3x3     | 67 (1)     | 20.25 (0.38)    |
| 5x5     | 111 (2)    | 22.15 (0.20)    |
| 7x7     | 156 (4)    | 24.13 (0.03)    |
| 10x10   | 231 (5)    | 26.57 (0.04)    |
| 14x14   | 348        | 30.07           |

Table (6) Summary of the 10-fold bootstrapped analysis of ASpli2 performance on the prostate cancer data set. For each number of paired samples (first column) the median number of genomic-regions displaying a statistically significant ‘tissue’ effect were included in the second column. Median values of false discovery rate estimations obtained from the analysis of normal-tissue samples were shown in the third column. Median time and memory used in the analysis were reported in the last two columns. Standard error estimation were reported between brackets.

353 Execution time scaled linearly with the number of paired samples at a  
354 rate of 25.5 minutes per pair of samples (about 90% of execution time was  
355 used for BAMs reading and feature counting). The memory peak column  
356 shows that RAM requirement linearly scaled with the number of samples at  
357 a rate of about 880Mb per sample pair. A simple extrapolation suggests that  
358 about 65Gb should be enough to handle 100 samples of the same sequencing

359 depth ( $\sim 3.510^6$  reads per sample).

### 360 **3. Material and Methods**

#### 361 *3.1. Differential analysis scheme*

362 ASpli2 leverages on the statistical framework developed by Smyth and  
363 collaborators, implemented in the edgeR R-package [24, 20], to assess for  
364 statistically significant changes in gene-expression, bin coverage and junction  
365 splicing signals. Under this approach, count data is modeled using a negative  
366 binomial model, and an empirical Bayes procedure is considered to moderate  
367 the degree of overdispersion across units.

368 *Differential expression signals.* Differential expression signals are estimated  
369 via generalized linear models (GLM). This approach allows ASpli2 to deal  
370 with complex experimental designs, i.e. contrasts can be tested in experi-  
371 ments with multiple experimental factors. Using this statistical setting, for  
372 each gene, ASpli2 quantifies differential gene expression signals reporting the  
373 corresponding log-fold change, p-value, and FDR adjusted q-values.

374 *Differential splicing signals.* In order to study splicing patterns, gene ex-  
375 pression changes should be deconvolved from overall count data. On a very  
376 general setting, what we are looking for is to test whether a given unit of a  
377 certain group of elements displays differential changes respect to the collec-  
378 tive or average behavior. ASpli2 uses this general idea to assess for statisti-  
379 cally significant changes in splicing patterns probed with different genomic  
380 features:

- 381 • bin-coverage signal: ASpli2 assesses for differential usage of bins com-  
382 paring bin's log-fold-changes with the overall log-fold-change of the  
383 corresponding gene.
- 384 • junction anchorage signal: For every experimentally detected junction,  
385 ASpli2 analyzes differential intron retention changes by considering log-  
386 fold-changes of a given experimental junction relative to changes in  
387 coverage of left and right junction flanking regions.
- 388 • junction locale signal: In the same spirit than MAJIQ and LeafCutter,  
389 ASpli2 defines junction-clusters as sets of junctions that share at least  
390 one end with another junction of the same cluster (see Panel E of  
391 Figure S8). In order to characterize changes for a given junction along  
392 experimental conditions, ASpli2 weighs log-fold-change of the junction  
393 of interest relative to the mean log-fold-change of junctions belonging  
394 to the same cluster.

395 ASpli2 makes use of the functionality implemented in the `diffSpliceDGE`  
396 function of the `edgeR` package to perform all of this comparisons within a uni-  
397 fied statistical framework. Given a set of elements (i.e. bins or junctions) of  
398 a certain group (i.e. genes, anchorage group or junction-cluster), a negative  
399 binomial generalized log-linear model is fit at the element level, considering  
400 an offset term that accounts for library normalization and collective changes.  
401 Differential usage is assessed testing coefficients of the GLM. At the single  
402 element-level, the relative log-fold-change is reported along with the associ-  
403 ated p-value and FDR adjusted q-values. In addition a group-level test is  
404 considered to check for differences in the usage of any element of the group

405 between experimental conditions (see *diffSpliceDGE* documentation included  
406 in edgeR package for details [24]).

### 407 3.2. Filtering and detection criteria

408 Statistical analysis of differential splicing is performed only on expressed  
409 genes (i.e. read counts spanning the gene genomic range should be larger  
410 than a minimal number of reads, 5 by default, across all the samples of the  
411 contrasted conditions). Furthermore, analyzed bins and junctions should  
412 present a minimal number of counts (5 by default) in every replicate of at  
413 least one contrasted condition. Additionally, marginally present junctions  
414 are filter-out looking at the maximal value of their *participation* coefficient,  
415 defined as the relative abundance of a given junction within its group for a  
416 given experimental condition.

417

418 Besides statistical figures of merit, ASpli2 provides additional statistics  
419 and parameters in order to ease the identification of biologically relevant  
420 events. For instance, magnitude of change in inclusion or strength indices  
421 (see Table S1) between experimental conditions, are also reported in order to  
422 filter-out weak events. In this way, a bin is called differentially-used by ASpli2  
423 if it displays statistically significant coverage changes ( $\text{fdr} < 0.05$ , by default)  
424 and, additionally, one of the two supplementary conditions hold: either the  
425 bin fold-change level is greater than a given threshold (3 fold changes, by  
426 default) or changes in inclusion levels of bin-supporting junctions ( $\Delta PIR$   
427 or  $\Delta PSI$  according to the bin class, see Table S1) surpasses a predefined  
428 threshold (0.2 by default).

429 Anchorage splicing signals, on the other hand, are reported whenever

430 statistically significant changes are found at the cluster level (cluster.fdr <  
431 0.05 by default) for the considered  $\{J_1, J_2, J_3\}$  junction set (see upper panel  
432 of Fig S8-D) and, at the same time,  $|\Delta PIR_{J_3}|$  is larger than a given threshold  
433 (0.3 by default).

434 Finally, junction locale differential splicing signals are reported when-  
435 ever statistically significant changes are found at the cluster level (cluster.fdr  
436 < 0.01 by default) for the analysed junction cluster  $\{J_1, \dots, J_S, \dots, J_n\}$  (see  
437 S8-E) and, at the same time, there is at least one junction  $J_S$  within the  
438 cluster presenting statistically significant changes at the single unit level  
439 (junction.fdr < 0.05, by default) with  $|\Delta Participation_{J_S}|$  larger than a given  
440 threshold (0.3 by default). In the case that statistically significant changes  
441 were detected at the unit-level for more than one junction of a given clus-  
442 ter, the one displaying the largest participation change was considered and  
443 reported as the cluster's representative junction.

### 444 3.3. Splicing simulation

445 We implemented a computational pipeline relying on the Flux Simulator  
446 (FS) software [33] in order to produce a controlled set of splicing events.  
447 We first used FS to generate a transcript abundance distribution template  
448 to spread  $15 \times 10^6$  molecules among the 10646 available transcript variants  
449 of the 8433 genes of chromosome-one of the *Arabidopsis thaliana* genome.  
450 Then, we generated a 'treatment' set of samples altering the original molecule  
451 distribution in order to simulate genome-wide differential changes in gene  
452 expression and splicing patterns.

453 Finally we simulated biological replicates from these two *seed* transcrip-  
454 tomes, considering a Gamma distribution for molecule abundances to build



455 'control' and 'treatment' sample sets. We chose to work with a  $CV = 0.1$   
456 level of variability in gene abundance between replicates. Therefore, we con-  
457 sidered *shape* ( $k = 100$ ), and *scale* ( $\theta = 0.01\mu$ ) parameter values, where  $\mu$   
458 was the gene expression level in the corresponding *seed* transcriptome used  
459 for replicate generation.

460 Simulated changes in variant concentrations produce patterns of differ-  
461 ential usage at bin and junction levels according to the exonic architecture  
462 of the different gene variants. For instance, a splicing alteration that in-  
463 volves switching between Isoform 1 and Isoform 3 of the gene depicted in  
464 Figure S8-(A) is expected to produce differential usage signals for the first  
465 and third exonic bins. In our case we simulated changes in variants usage for  
466 915 genes that should altered, in principle, the coverage signal of 2451 bins.  
467 It is worth mentioning that as alternative splicing was modeled exclusively  
468 through differential variant usage, no intron retention events were simulated  
469 in the synthetic data set.

470 Several examples of splicing simulated events are depicted in Sup. Figs  
471 S4,S6,S5. Examples, scripts and additional material to reproduce the ASpli2  
472 analysis over this dataset can be found at the gitlab repo: [https://gitlab.com/ChernoLab/aspli2\\_sm](https://gitlab.com/ChernoLab/aspli2_sm).

### 473 3.4. *PRMT5 datasets*

474 The goal of these studies was to compare the transcriptional profile (RNA-  
475 seq) of wild type and PRMT5 Arabidopsis mutants plants grown under con-  
476 tinuous light at 22 degrees centigrades.

477 Dataset A (GSE149429): WT (Col) and PRMT5 mutants seeds were  
478 grown on Murashige and Skoog medium containing 0.8% agarose, stratified  
479 for 4 d in the dark at 4 C, and then grown for fifteen days under continuous

480 white light at 22C Whole plants were harvested after 15 d. Total RNA was ex-  
481 tracted with RNeasy Plant Mini Kit (QIAGEN) following the manufacturers  
482 protocols. To estimate the concentration and quality of samples, NanoDrop  
483 2000c (Thermo Scientific) and gel electrophoresis were used, respectively. Li-  
484 braries were prepared following the TruSeq RNA Sample Preparation Guide  
485 (Illumina). Briefly, 3 g of total RNA was polyA-purified and fragmented,  
486 and first-strand cDNA synthesized by reverse transcriptase (SuperScript II;  
487 Invitrogen) and random hexamers. This was followed by RNA degradation  
488 and second-strand cDNA synthesis. End repair process and addition of a sin-  
489 gle A nucleotide to the 3 ends allowed ligation of multiple indexing adapters.  
490 Then, an enrichment step of 12 cycles of PCR was performed. Library vali-  
491 dation included size and purity assessment with the Agilent 2100 Bioanalyzer  
492 and the Agilent DNA1000 kit (Agilent Technologies)

493 Dataset B (GSE149429): WT (Col accession) and PRMT5 mutant plants  
494 were grown for nine days under continuous white light at 22 degrees centi-  
495 grades or exposed for 1 or 24 h to 10C on the 9th day, before harvesting.  
496 Then the transcriptional profile of these plants was analyzed using RNA-seq.  
497 WT (Col) and PRMT5 mutants seeds were grown on Murashige and Skoog  
498 medium containing 0.8% agarose, stratified for 4 d in the dark at 4 C, and  
499 then grown for nine days under continuous white light at 22C. Whole plants  
500 were harvested after 9 d. Total RNA was extracted with RNeasy Plant Mini  
501 Kit (QIAGEN) following the manufacturers protocols. To estimate the con-  
502 centration and quality of samples, NanoDrop 2000c (Thermo Scientific) and  
503 gel electrophoresis were used, respectively. Libraries were prepared following  
504 the TruSeq RNA Sample Preparation Guide (Illumina). Briefly, 3 g of total

505 RNA was polyA-purified and fragmented, and first-strand cDNA synthesized  
506 by reverse transcriptase (SuperScript II; Invitrogen) and random hexamers.  
507 This was followed by RNA degradation and second-strand cDNA synthesis.  
508 End repair process and addition of a single A nucleotide to the 3 ends al-  
509 lowed ligation of multiple indexing adapters. Then, an enrichment step of 12  
510 cycles of PCR was performed. Library validation included size and purity  
511 assessment with the Agilent 2100 Bioanalyzer and the Agilent DNA1000 kit  
512 (Agilent Technologies).

513

514 On average,  $19.3 \pm 5.3$  million 100 long and  $28.3 \pm 7.7$  million 150 long  
515 paired-end reads were generated per sample library for datasets *A* and *B*  
516 respectively. For both cases more than 96% of reads were uniquely mapped  
517 to TAIR10 Arabidopsis genome using STAR (command-line invocation was  
518 included in Sup Mat 8.2).

### 519 *3.5. Overlap analysis*

520 We followed the procedure outlined in Supplementary Material 8.3 to  
521 map events reported by each of the considered method to a common set of  
522 genomic coordinates. Overlaps were then estimated using the *findOverlaps*  
523 function of the *IRanges* package of R [34].

### 524 *3.6. Prostate cancer dataset*

525 Fifty-six paired fastq files from the E-MTAB-567 experiment were down-  
526 loaded from the ArrayExpress server. Reads were aligned against ENSEMBL  
527 HG38.98 reference genome using the STAR aligner with default parameters  
528 and a junction overhang=89.

529 *3.7. Code availability*

530 ASpli2 package is freely available at <https://gitlab.com/ChernoLab/aspli2>,  
531 and will be part of the next Bioconductor release (October 2020). Examples,  
532 scripts and additional material to reproduce our analysis can be found at the  
533 gitlab repo: [https://gitlab.com/ChernoLab/aspli2\\_sm](https://gitlab.com/ChernoLab/aspli2_sm).

534 **4. Discussion**

535 RNA high-throughput sequencing methods provide powerful means to  
536 study alternative splicing under multiple conditions in a genome-wide man-  
537 ner. However, the detection and understanding of general splicing patterns  
538 still present considerable technical challenges. Here we presented ASpli2, a  
539 computational suite to comprehensively test bin coverage and junction usage  
540 differential splicing signals.

541 The analysis methodology implemented in ASpli2 came out as a result  
542 of several software maturation cycles of our in-house splicing analysis proce-  
543 dures. Over the last years, the presented core functionality has been exten-  
544 sively used in different projects to study: the role of AS in circadian rhythms  
545 and light response [35, 36, 37, 38, 39] as well as AS in spliceosome mutants  
546 [40, 41] in *A.thaliana* model organism. In addition, ASpli2 in-house versions  
547 have been used to study AS and rhythmic behavior in *D.melanogaster* [42]  
548 and to characterize AS in dengue’s viral infection in humans [43].

549

550 In order to quantify ASpli2’s performance we compared it against three  
551 different state-of-the-art methodologies: LeafCutter [23], MAJIQ [44] and  
552 rMATS [22]. As a general rule we considered default parameters to run these

553 analysis pipelines for our intention was not to present here an extensive  
554 benchmark between bioinformatics approaches, nor to propose the definitive  
555 analysis methodology. Rather we wanted to establish whether ASpli2 pro-  
556 duced reasonable and competitive results.

557

558 Different scenarios were considered to chart ASpli2 performance. We first  
559 analyzed a synthetic data-set and quantified the ability of each considered  
560 methodology to detect splicing changes in terms of precision and sensitiv-  
561 ity figures of merit. Using this controlled dataset we found that all the  
562 analysed methods presented rather high precision levels. However ASpli2  
563 systematically displayed larger recall values ( $\sim 40\%$ ), mainly because the  
564 use of coverage signals (see Fig 1). This is an important result as highlights  
565 the benefits of not losing effective sequencing depth by relying not only on  
566 junction information but on the complete set of reads of RNA-seq runs.

567

568 We then aimed to outline ASpli2's performance over more realistic setups.  
569 As no internal gold-standards are usually available for real world datasets  
570 we focused on the analysis of two independent RNAseq assays that probed  
571 the same biological conditions. This allowed us to quantify the consistence  
572 and coherence of outcomes produced by each methodology in terms of re-  
573 producibility of discoveries. Our results suggested that detection agreement  
574 between studies was highly significative for every methodology. However  
575 ASpli2 was far superior in terms of total number of concordant discoveries  
576 reported.

577 It is worth noting that a necessary condition implicit in this analysis was

578 that biological variability largely exceeded possible technical biases between  
579 studies. Using ASpli2, we were able to consider a generalized linear model to  
580 define a consolidated dataset integrating data from both studies and verified  
581 that this was actually the case (Sec 2.4). In addition, the possibility to imple-  
582 ment a two-factor model greatly improved the statistical power to uncover  
583 consistent discoveries. We could identify 4314 events displaying a statis-  
584 tically significant genotype effect and no evidence of experiment-genotype  
585 interactions. This represented almost a two-fold increase in the number of re-  
586 producible discoveries when compared against the naive integrative approach  
587 that merely considered the 2241 splicing events simultaneously detected in  
588 both studies.

589

590 An important aspect of the presented approach is that ASpli2's core  
591 functionality is implemented along user-friendly functions that produce self-  
592 contained output results for each step of the analysis. This is an important  
593 feature from the user's perspective. It provides the user valuable intermedi-  
594 ate information eventually facilitating the integration of ASpli2 with other  
595 analysis pipelines.

## 596 **5. Conclusions**

597 In this paper we presented ASpli2, a computational suite to study alter-  
598 native splicing events. It is implemented as a flexible R modular package  
599 that allows users to fulfill gene-expression and splicing analysis following a  
600 set of simple steps.

601 Noticeably, ASpli2 can handle complex experimental designs using a uni-

602 fied statistical framework to assess for differential usage of sub-genic features  
603 and junctions. By combining statistical information from exons, introns, and  
604 splice junctions ASpli2 can provide an integrative view of splicing landscapes  
605 that might include canonical and non-canonical splicing patterns occurring  
606 in annotated as well as in novel splicing variants.

### 607 **Acknowledgements**

608 We thank Ruben Schlaen, Julieta Mateos and Andres Romanowski for  
609 helpful discussions

### 610 **Funding**

611 This work has been supported by grants from Agencia Nacional de Pro-  
612 moción Científica y Tecnológica (ANPCyT). AC also acknowledges support  
613 from University of Buenos Aires (grant 20020170100356BA). AC and MY are  
614 members of Carrera de Investigador of Consejo Nacional de Investigaciones  
615 Científicas y Técnicas (CONICET).

## 616 6. Bibliography

- 617 [1] R. E. Breitbart, A. Andreadis, B. Nadal-Ginard, Alternative splicing:  
618 a ubiquitous mechanism for the generation of multiple protein isoforms  
619 from single genes., *Annu. Rev. Biochem.* 56 (1987).
- 620 [2] W. T. Nilsen, B. R. Graveley, Expansion of the eukaryotic proteome  
621 by alternative splicing., *Nature* 463 (2010).
- 622 [3] D. Brett, H. Pospisil, J. Valcárcel, J. Reich, P. Bork, Alternative splicing  
623 and genome complexity, *Nature Genetics* 30 (2002) 29–30.
- 624 [4] A. S. Reddy, Y. Marquez, M. Kalyna, A. Barta, Complexity of the  
625 alternative splicing landscape in plants, *The Plant Cell* 25 (2013) 3657–  
626 3683.
- 627 [5] J. Vaquero-Garcia, A. Barrera, M. R. Gazzara, J. Gonzalez-Vallinas,  
628 N. F. Lahens, J. B. Hogenesch, K. W. Lynch, Y. Barash, A new view  
629 of transcriptome complexity and regulation through the lens of local  
630 splicing variations, *eLife* 5 (2016) e11752.
- 631 [6] K. A., O. C. S., Z. Y., R. G., SplAdder: identification, quantification  
632 and testing of alternative splicing events from RNA-Seq data, *Bioinform-*  
633 *atics* (????).
- 634 [7] R. Liu, A. E. Loraine, J. A. Dickerson, Comparisons of computational  
635 methods for differential alternative splicing detection using rna-seq in  
636 plant systems, *BMC Bioinformatics* 15 (2014) 364.



- 637 [8] L. Ding, E. Rath, Y. Bai, Comparison of alternative splicing junction  
638 detection tools using rna-seq data, *Curr Genomics* 18 (2017) 268–277.  
639 28659722[pmid].
- 640 [9] C. Zhang, B. Zhang, L.-L. Lin, S. Zhao, Evaluation and comparison of  
641 computational tools for rna-seq isoform quantification, *BMC Genomics*  
642 18 (2017) 583.
- 643 [10] B. J. Blencowe, Alternative splicing: New insights from global analyses,  
644 *Cell* 126 (2006) 37 – 47.
- 645 [11] A. Lapuk, H. Marr, L. Jakkula, H. Pedro, S. Bhattacharya, E. Pur-  
646 dom, Z. Hu, K. Simpson, L. Pachter, S. Durinck, N. Wang, B. Parvin,  
647 G. Fontenay, T. Speed, J. Garbe, M. Stampfer, H. Bayandorian, S. Dor-  
648 ton, T. A. Clark, A. Schweitzer, A. Wyrobek, H. Feiler, P. Spellman,  
649 J. Conboy, J. W. Gray, Exon-level microarray analyses identify alter-  
650 native splicing programs in breast cancer, *Molecular Cancer Research* 8  
651 (2010) 961–974.
- 652 [12] Z. Wang, M. Gerstein, M. Snyder, Rna-seq: a revolutionary tool for  
653 transcriptomics, *Nature Reviews Genetics* 10 (2009) 57 EP –. Perspec-  
654 tive.
- 655 [13] F. Ozsolak, P. M. Milos, Rna sequencing: advances, challenges and  
656 opportunities, *Nature Reviews Genetics* 12 (2010) 87 EP –. Review  
657 Article.
- 658 [14] Y. Katz, E. T. Wang, E. M. Airoidi, C. B. Burge, Analysis and design

- 659 of rna sequencing experiments for identifying isoform regulation, *Nature*  
660 *Methods* 7 (2010) 1009 EP –. Article.
- 661 [15] C. Trapnell, A. Roberts, L. Goff, G. Pertea, D. Kim, D. R. Kelley,  
662 H. Pimentel, S. L. Salzberg, J. L. Rinn, L. Pachter, Differential gene  
663 and transcript expression analysis of rna-seq experiments with tophat  
664 and cufflinks, *Nature Protocols* 7 (2012) 562 EP –.
- 665 [16] N. L. Bray, H. Pimentel, P. Melsted, L. Pachter, Near-optimal proba-  
666 bilistic rna-seq quantification, *Nature Biotechnology* 34 (2016) 525–527.
- 667 [17] R. Patro, G. Duggal, M. I. Love, R. A. Irizarry, C. Kingsford, Salmon  
668 provides fast and bias-aware quantification of transcript expression, *Na-  
669 ture Methods* 14 (2017) 417–419.
- 670 [18] S. Anders, A. Reyes, W. Huber, Detecting differential usage of exons  
671 from rna-seq data, *Genome Research* 22 (2012) 2008–2017.
- 672 [19] D. J. McCarthy, G. K. Smyth, M. D. Robinson, edgeR: a Bioconductor  
673 package for differential expression analysis of digital gene expression  
674 data, *Bioinformatics* 26 (2009) 139–140.
- 675 [20] D. J. McCarthy, C. Y., G. K. Smyth, Differential expression analysis of  
676 multifactor RNA-seq experiments with respect to biological variation,  
677 *Nucleic Acids Research* 40 (2012).
- 678 [21] C. W. Law, Y. Chen, W. Shi, G. K. Smyth, voom: precision weights  
679 unlock linear model analysis tools for rna-seq read counts, *Genome  
680 Biology* 15 (2014) R29.

- 681 [22] S. Shen, J. W. Park, Z.-x. Lu, L. Lin, M. D. Henry, Y. N. Wu, Q. Zhou,  
682 Y. Xing, *rmats: Robust and flexible detection of differential alterna-*  
683 *tive splicing from replicate rna-seq data*, *Proceedings of the National*  
684 *Academy of Sciences* 111 (2014) E5593–E5601.
- 685 [23] Y. I. Li, D. A. Knowles, J. Humphrey, A. N. Barbeira, S. P. Dickinson,  
686 H. K. Im, J. K. Pritchard, *Annotation-free quantification of rna splicing*  
687 *using leafcutter*, *Nature Genetics* 50 (2018) 151–158.
- 688 [24] M. D. Robinson, D. J. McCarthy, G. K. Smyth, *edgeR: a Bioconductor*  
689 *package for differential expression analysis of digital gene expression*  
690 *data*, *Bioinformatics* 26 (2010).
- 691 [25] S. E. Sanchez, E. Petrillo, E. J. Beckwith, X. Zhang, M. L. Rugnone,  
692 C. E. Hernando, J. C. Cuevas, M. A. Godoy Herz, A. Depetris-Chauvin,  
693 C. G. Simpson, J. W. S. Brown, P. D. Cerdán, J. O. Borevitz, P. Mas,  
694 M. F. Ceriani, A. R. Kornblihtt, M. J. Yanovsky, *A methyl transferase*  
695 *links the circadian clock to the regulation of alternative splicing*, *Nature*  
696 468 (2010) 112–116.
- 697 [26] C. E. Hernando, S. E. Sanchez, E. Mancini, M. J. Yanovsky, *Genome*  
698 *wide comparative analysis of the effects of prmt5 and prmt4/carm1*  
699 *arginine methyltransferases on the arabidopsis thaliana transcriptome*,  
700 *BMC Genomics* 16 (2015) 192.
- 701 [27] A. P. Roworth, S. M. Carr, G. Liu, W. Barczak, R. L. Miller, S. Munro,  
702 A. Kanapin, A. Samsonova, N. B. La Thangue, *Arginine methyl-*  
703 *ation expands the regulatory mechanisms and extends the genomic land-*

- 704 scape under e2f control, *Science advances* 5 (2019) eaaw4640–eaaw4640.  
705 31249870[pmid].
- 706 [28] X. Deng, L. Gu, C. Liu, T. Lu, F. Lu, Z. Lu, P. Cui, Y. Pei, B. Wang,  
707 S. Hu, X. Cao, Arginine methylation mediated by the arabidopsis ho-  
708 molog of prmt5 is essential for proper pre-mrna splicing, *Proceedings of*  
709 *the National Academy of Sciences* 107 (2010) 19114–19119.
- 710 [29] S. Ren, Z. Peng, J.-H. Mao, Y. Yu, C. Yin, X. Gao, Z. Cui, J. Zhang,  
711 K. Yi, W. Xu, C. Chen, F. Wang, X. Guo, J. Lu, J. Yang, M. Wei,  
712 Z. Tian, Y. Guan, L. Tang, C. Xu, L. Wang, X. Gao, W. Tian, J. Wang,  
713 H. Yang, J. Wang, Y. Sun, Rna-seq analysis of prostate cancer in the  
714 chinese population identifies recurrent gene fusions, cancer-associated  
715 long noncoding rnas and aberrant alternative splicings, *Cell Research*  
716 22 (2012) 806–821.
- 717 [30] M. Wang, Y. Zhao, B. Zhang, Efficient test and visualization of multi-set  
718 intersections, *Scientific Reports* 5 (2015) 16923.
- 719 [31] C. G. Simpson, J. Fuller, M. Maronova, M. Kalyna, D. Davidson, J. Mc-  
720 Nicol, A. Barta, J. W. S. Brown, Monitoring changes in alternative pre-  
721 cursor messenger rna splicing in multiple gene transcripts, *The Plant*  
722 *Journal* 53 (2008) 1035–1048.
- 723 [32] A. Mehmood, A. Laiho, M. S. Venlinen, A. J. McGlinchey, N. Wang,  
724 L. L. Elo, Systematic evaluation of differential splicing tools for RNA-seq  
725 studies, *Briefings in Bioinformatics* (2019). Bbz126.

- 726 [33] T. Griebel, B. Zacher, P. Ribeca, E. Raineri, V. Lacroix, R. Guigo,  
727 M. Sammeth, Modelling and simulating generic RNA-Seq experiments  
728 with the flux simulator, *Nucleic Acids Res.* 40 (2012) 10073–10083.
- 729 [34] M. Lawrence, W. Huber, H. Pagès, P. Aboyoun, M. Carlson, R. Gentle-  
730 man, M. T. Morgan, V. J. Carey, Software for computing and annotating  
731 genomic ranges, *PLOS Computational Biology* 4 (2013).
- 732 [35] M. L. Rugnone, A. F. Soverna, S. E. Sanchez, R. G. Schlaen, C. E.  
733 Hernando, D. K. Seymour, E. Mancini, A. Chernomoretz, D. Weigel,  
734 P. Más, et al., Lnk genes integrate light and clock signaling networks  
735 at the core of the arabidopsis oscillator, *Proceedings of the National*  
736 *Academy of Sciences* 110 (2013) 12120–12125.
- 737 [36] S. Perez-Santángelo, E. Mancini, L. J. Francey, R. G. Schlaen, A. Cher-  
738 nomoretz, J. B. Hogenesch, M. J. Yanovsky, Role for lsm genes in the  
739 regulation of circadian rhythms, *Proceedings of the National Academy*  
740 *of Sciences* 111 (2014) 15166–15171.
- 741 [37] E. Mancini, S. E. Sanchez, A. Romanowski, R. G. Schlaen, M. Sanchez-  
742 Lamas, P. D. Cerdan, M. J. Yanovsky, Acute effects of light on alter-  
743 native splicing in light-grown plants, *Photochemistry and photobiology*  
744 92 (2016) 126–133.
- 745 [38] R. Xin, L. Zhu, P. A. Salomé, E. Mancini, C. M. Marshall, F. G. Harmon,  
746 M. J. Yanovsky, D. Weigel, E. Huq, Spf45-related splicing factor for  
747 phytochrome signaling promotes photomorphogenesis by regulating pre-

- 748 mRNA splicing in arabidopsis, *Proceedings of the National Academy of*  
749 *Sciences* 114 (2017) E7018–E7027.
- 750 [39] A. Romanowski, R. G. Schlaen, S. Perez-Santangelo, E. Mancini, M. J.  
751 Yanovsky, Global transcriptome analysis reveals circadian control of  
752 splicing events in arabidopsis thaliana, *bioRxiv* (2019) 845560.
- 753 [40] C. E. Hernando, S. E. Sanchez, E. Mancini, M. J. Yanovsky, Genome  
754 wide comparative analysis of the effects of prmt5 and prmt4/carm1  
755 arginine methyltransferases on the arabidopsis thaliana transcriptome,  
756 *BMC genomics* 16 (2015) 192.
- 757 [41] R. G. Schlaen, E. Mancini, S. E. Sanchez, S. Perez-Santángelo, M. L.  
758 Rugnone, C. G. Simpson, J. W. Brown, X. Zhang, A. Chernomoretz,  
759 M. J. Yanovsky, The spliceosome assembly factor gemin2 attenuates  
760 the effects of temperature on alternative splicing and circadian rhythms,  
761 *Proceedings of the National Academy of Sciences* 112 (2015) 9382–9387.
- 762 [42] E. J. Beckwith, C. E. Hernando, S. Polcowñuk, A. P. Bertolin,  
763 E. Mancini, M. F. Ceriani, M. J. Yanovsky, Rhythmic behavior is con-  
764 trolled by the srm160 splicing factor in drosophila melanogaster, *Genet-*  
765 *ics* 207 (2017) 593–607.
- 766 [43] F. A. De Maio, G. Risso, N. G. Iglesias, P. Shah, B. Pozzi, L. G. Geb-  
767 hard, P. Mammi, E. Mancini, M. J. Yanovsky, R. Andino, et al., The  
768 dengue virus ns5 protein intrudes in the cellular spliceosome and mod-  
769 ulates splicing, *PLoS pathogens* 12 (2016).

- 770 [44] J. Vaquero-Garcia, S. Norton, Y. Barash, Leafcutter vs. majiq and  
771 comparing software in the fast moving field of genomics, bioRxiv (2018).
- 772 [45] S. Schafer, K. Miao, C. C. Benson, M. Heinig, S. A. Cook, N. Hubner,  
773 Alternative splicing signatures in rna-seq data: Percent spliced in (psi),  
774 Current Protocols in Human Genetics 87 (????) 11.16.1–11.16.14.

775 7. Supplementary Figures

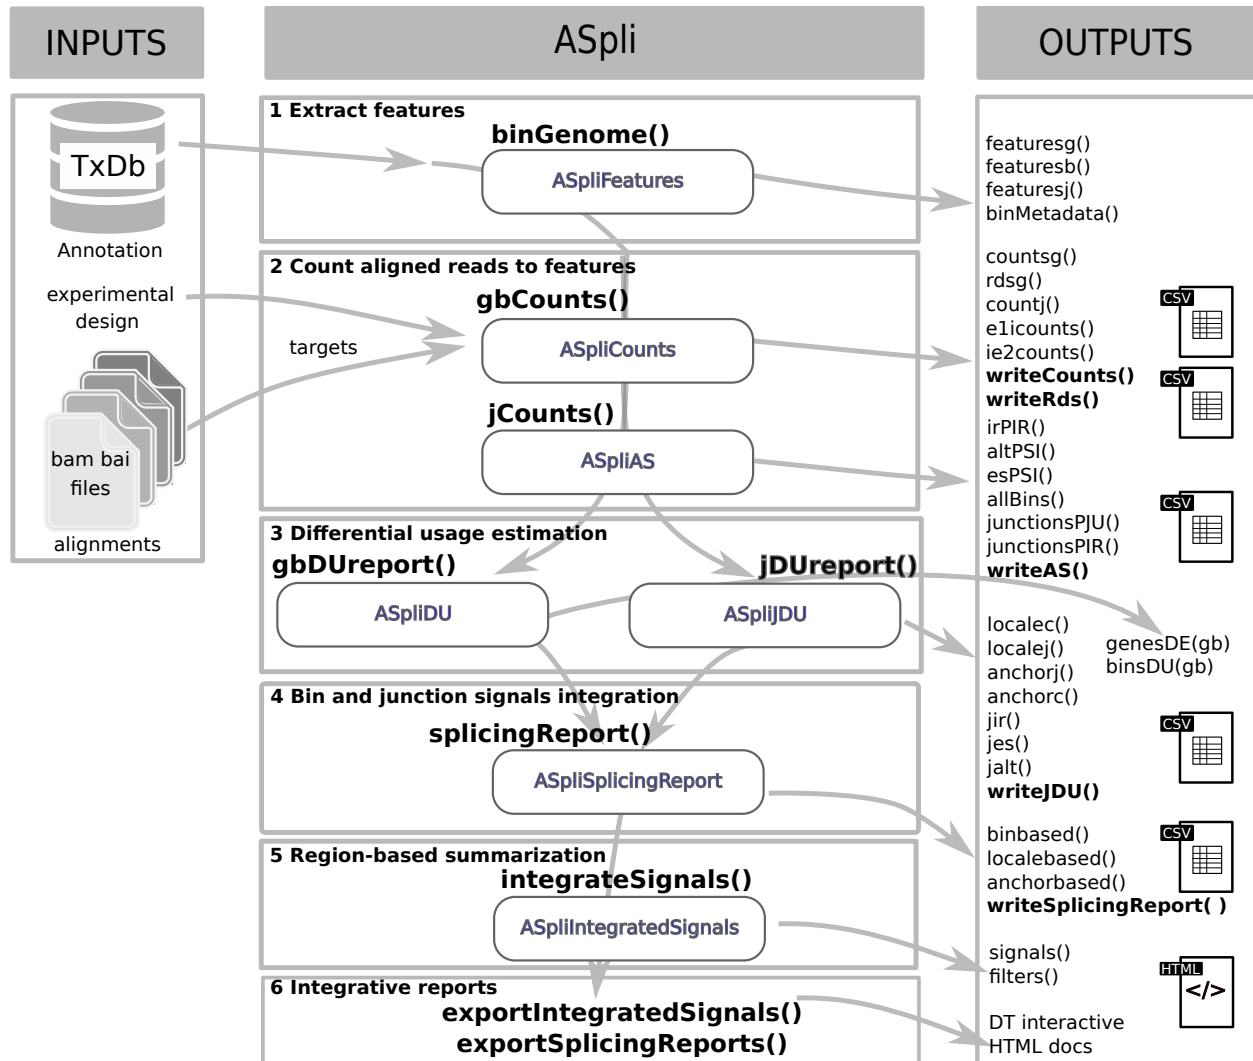

Figure (S1) ASpli workflow. Rounded boxes are objects created by ASpli functions. Accessors and outputs are summarized in the right-most panel



|                      | ASpli function     | Description                         | Genomic feature              |                                                         |                                             |
|----------------------|--------------------|-------------------------------------|------------------------------|---------------------------------------------------------|---------------------------------------------|
|                      |                    |                                     | gene                         | bin                                                     | junction                                    |
|                      | binGenome()        | Identification of subgenic features |                              | Genome binning<br>Event type classification             |                                             |
| Counting             | gbCounts()         | Counts over the annotated genome    | Counts<br>Read density       | Counts<br>Read density                                  | Counts<br><i>Exon</i> detection             |
|                      | jCounts ()         | Junction-based stats                |                              | Counting of annotated junctions                         | Detection of novel AS events                |
| Differential signals | gbDUreport()       | Coverage-based differential signal  | Differential gene expression | Differential bin usage                                  | Differential junction usage                 |
|                      | jDUreport()        | Junction-based differential signal  |                              | Differential usage of bin inclusion/exclusion junctions | Differential usage inside junction clusters |
| Report               | splicingReport ()  | Leveraging splicing evidence        |                              | Bin coverage signals                                    | Anchorage and locale signals                |
|                      | integrateSignals() | Signal consolidation                |                              |                                                         |                                             |

Figure (S2) Summary of ASpli core functionality.

Show  entries

Search:

## ASpli: integrated signals. Contrasts: A\_C - A\_D

Filters: bin.FC=3; bin.fdr=0.05; nonunif=1; usenonunif=FALSE; bin.inclusion=0.2; bjs.inclusion=10.3; bjs.fdr=0.01; a.inclusion=0.3; a.fdr=0.01; l.inclusion=0.3; l.fdr

| View                               | Region                           | Event                              | Locus                              | Locus overlap                      | Bin Evidence                       | Bin SJ Evidence                    | Anchor Evidence                    | Locale Evidence                    | Bin                                | Feature                            | Bins                               |                                    |                                  |                                    |
|------------------------------------|----------------------------------|------------------------------------|------------------------------------|------------------------------------|------------------------------------|------------------------------------|------------------------------------|------------------------------------|------------------------------------|------------------------------------|------------------------------------|------------------------------------|----------------------------------|------------------------------------|
|                                    |                                  |                                    |                                    |                                    |                                    |                                    |                                    |                                    |                                    |                                    | logFC                              | FDR                                | LR                               | FD                                 |
| <input type="button" value="All"/> | <input type="text" value="All"/> | <input type="button" value="All"/> | <input type="button" value="All"/> | <input type="button" value="All"/> | <input type="button" value="All"/> | <input type="button" value="All"/> | <input type="button" value="All"/> | <input type="button" value="All"/> | <input type="button" value="All"/> | <input type="button" value="All"/> | <input type="button" value="All"/> | <input type="button" value="All"/> | <input type="button" value="A"/> | <input type="button" value="All"/> |
| ⊕                                  | reference:1250-1601              | ES                                 | GENE02                             | -                                  | 0                                  | 0                                  | 0                                  | 1                                  |                                    | -                                  |                                    |                                    |                                  |                                    |
| ⊕                                  | reference:2250-2501              | Alt 5'/3'                          | GENE03                             | -                                  | 0                                  | 0                                  | 0                                  | 1                                  |                                    | -                                  |                                    |                                    |                                  |                                    |
| ⊕                                  | reference:3250-3501              | Alt 5'/3'                          | GENE04                             | -                                  | 0                                  | 0                                  | 0                                  | 1                                  |                                    | -                                  |                                    |                                    |                                  |                                    |
| ⊕                                  | reference:4251-4350              | Alt5ss                             | GENE05                             | -                                  | 1                                  | 0                                  | 0                                  | 0                                  | GENE05:E002                        | E                                  | 1.067                              | 1.074e-14                          |                                  |                                    |
| ⊖                                  | reference:7251-7350              | IR*                                | GENE08                             | -                                  | 1                                  | 0                                  | 1                                  | 0                                  | GENE08:E002                        | E                                  | 0.6338                             | 7.125e-8                           |                                  |                                    |

### Gene view

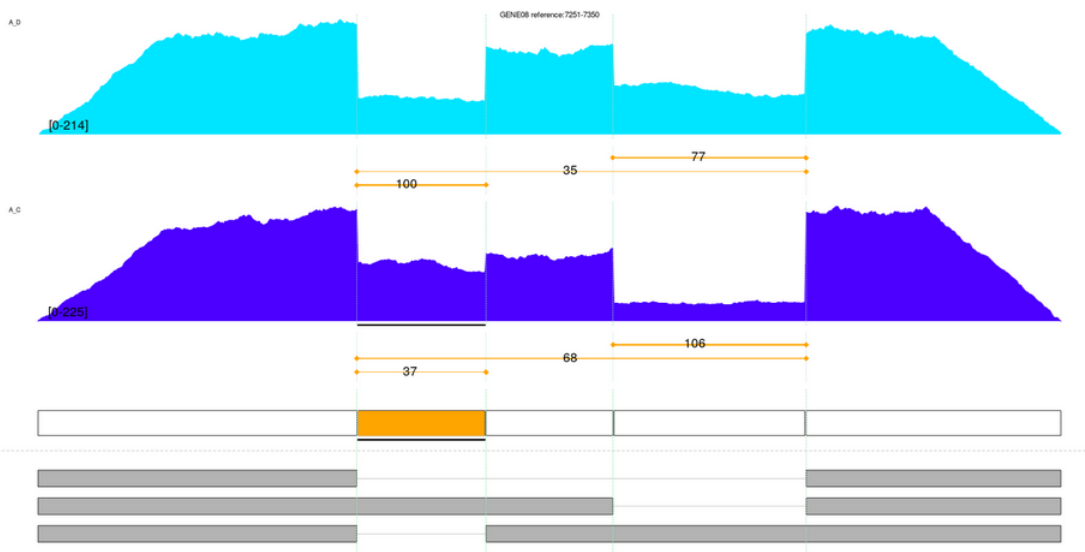

Figure (S3) Example of DT html interactive report generated by *exportIntegratedSignals()* function

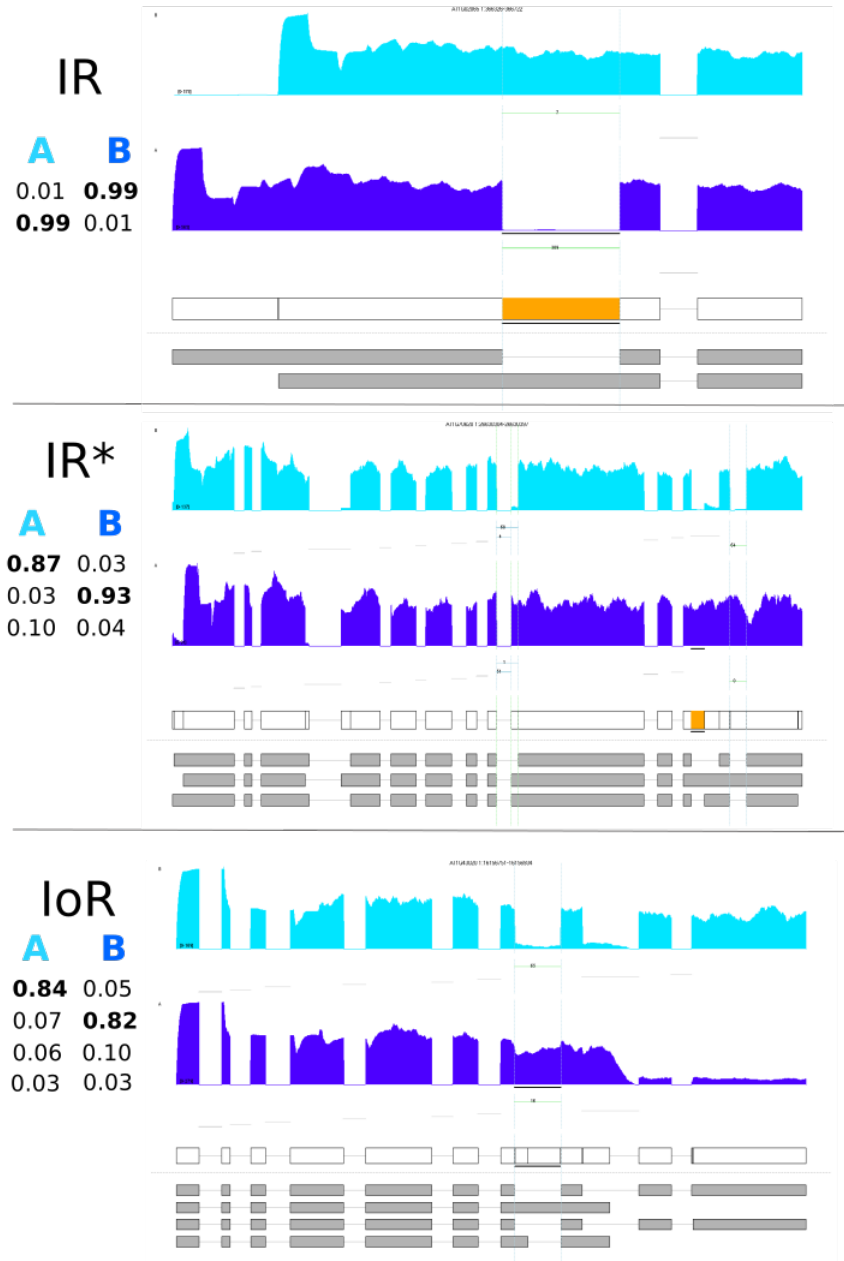

Figure (S4) Examples of simulated IR-like splicing events. For each panel, the left layered table shows the relative concentration of each variant simulated for condition A and B. Orange boxes highlight the considered bin in each case.

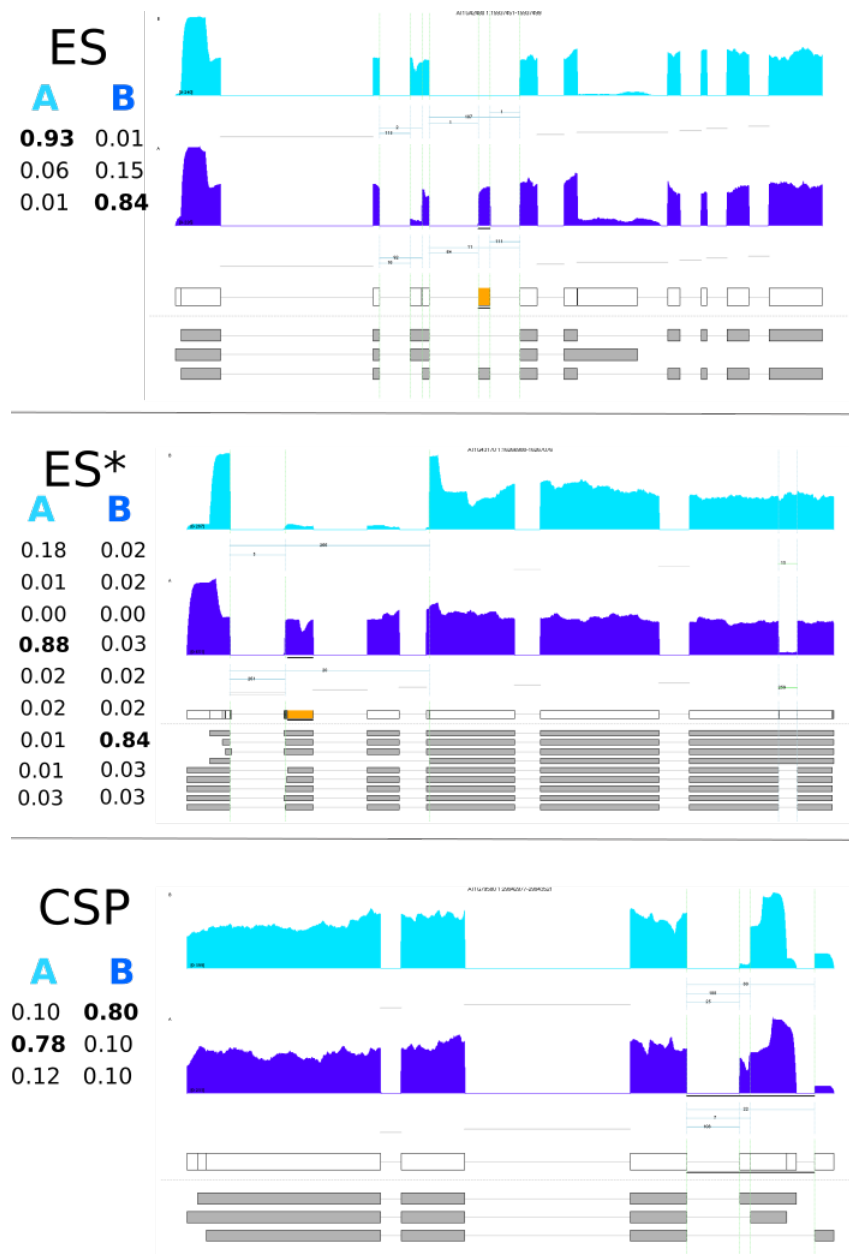

Figure (S5) Examples of simulated ES-like splicing events. For each panel, the left layered table shows the relative concentration of each variant simulated for condition A and B. Orange boxes highlight the considered bin in each case.

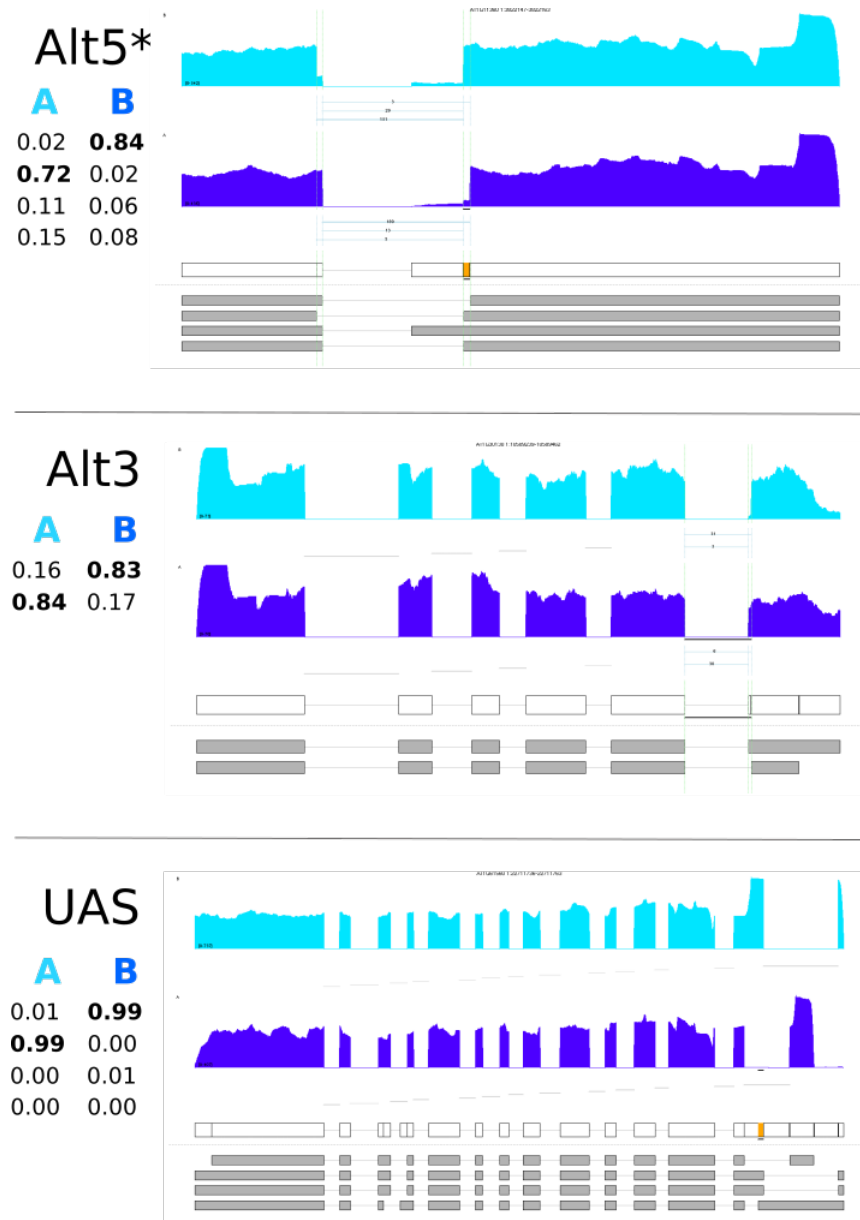

Figure (S6) Examples of simulated Alternative start/end splicing events. For each panel, the left layered table shows the relative concentration of each variant simulated for condition A and B. Orange boxes highlight the considered bin in each case.

**fdr.Interaction > 0.5**

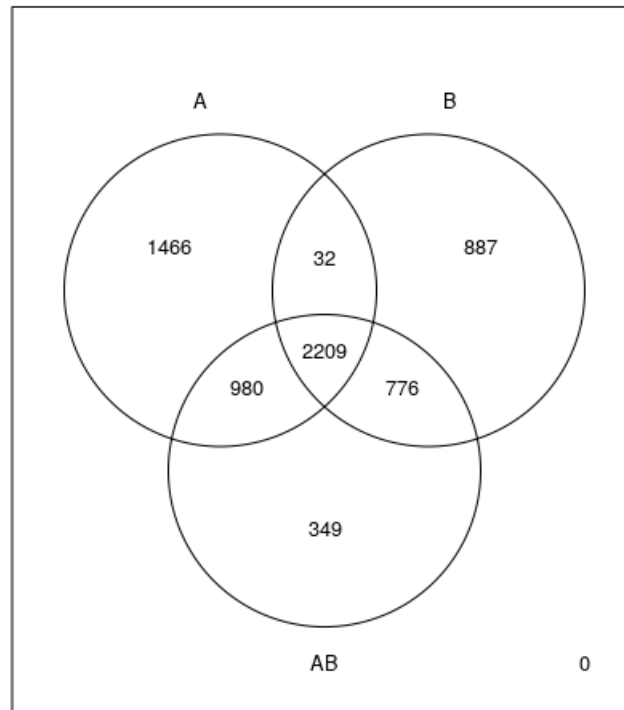

Figure (S7) Venn diagram of alternative splicing events detected in experiments A, B, and the consolidated data set AB (i.e. events displaying strong evidence of a genotype effect ( $fdr < 0.05$ ) and no-detectable evidence of experiment-genotype interaction (experiment:genotype associated  $fdr > 0.5$ )).

## 776 8. Supplementary Material

### 777 8.1. Feature counting in ASpli

#### 778 8.1.1. Genomic feature extraction: binGenome()

779 Sub-genic features are analyzed using user-provided annotation files. Exon  
780 and intron coordinates are extracted from annotation for multi-exonic genes.  
781 When more than one isoform exists, some exons and introns from different  
782 isoforms will generally overlap. In the same spirit of [18], exons and introns  
783 are then subdivided into non-overlapping sub-genic features dubbed bins, de-  
784 fined by the boundaries of different exons across transcript variants. In this  
785 way, these so defined *bins* are maximal sub-genic features entirely included  
786 or entirely excluded from any mature transcript.

787 Bins are flagged as: exonic (E), intronic (I) or alternative-splicing (AS)  
788 bins, depending on the exonic/intronic character of the bin across variants .  
789 In addition, original intronic (Io) bins are defined for every intronic region of  
790 annotated isoforms (see panel A of Figure S8).

791 As a general rule, the extreme portions of a transcript probed by RNAseq  
792 assays show a highly non-uniform coverage that might obscure differential  
793 usage analysis. ASpli flags bins that overlap with the beginning or ending of  
794 any transcript as *external*. An external bin of a transcript may overlap with  
795 a non-external one of another transcript. Whenever this happens the bin is  
796 still labelled as external. Additionally, in order to avoid confounding effects  
797 in the analysis of splicing events, ASpli identifies and flags loci where more  
798 than one gene is present in the genome.

799 *Local splicing classification model.* Each AS bin is further classified consid-  
800 ering a three-bin *minimum local gene model*, that assigns splicing-event cat-

801 egories to a given bin based on the intronic/exonic character of the analyzed  
802 bin and its first neighbors (Figure S8, panel B).

803 For genes presenting two isoforms, this model is able to unambiguously  
804 assign a well defined splicing event to the analyzed bin: exon skipping (ES),  
805 intron retention (IR), alternative five prime splicing site (Alt5'SS), or alter-  
806 native three prime splicing site (Alt3'SS) (see first row of panel B in Figure  
807 S8).

808 When more than two isoforms are present, we still found it useful to use  
809 the three-bin local model to segment follow up analysis. For these cases ASpli  
810 identify splicing events that involve: intronic subgenomic regions surrounded by  
811 exons in at least one isoform (bin labelled as IR\*), exonic subgenomic regions  
812 surrounded by two introns in at least one isoform (bin labelled as ES\*), ex-  
813 onic regions surrounded by intronic and exonic neighbor bins (bin labelled  
814 as Alt5'SS\* or Alt3'SS\*). When it is not possible to get a clear splicing-type  
815 assignation (see rows 2-5 of Figure S8), bins are labeled as *undefined AS*  
816 (UAS).

817

818 As a last step of the genomic feature extraction process, annotated junc-  
819 tions from all the transcripts are also identified. Junction coordinates are  
820 defined as the last position of the five prime exon (donor position) and the  
821 first position of the three prime exon (acceptor position).

822

### 823 *8.1.2. Annotation based feature counting: gbCounts()*

824 Reads are overlaid on features derived from annotation, and count tables  
825 are produced at different genomic levels: genes, bins, and intron flanking



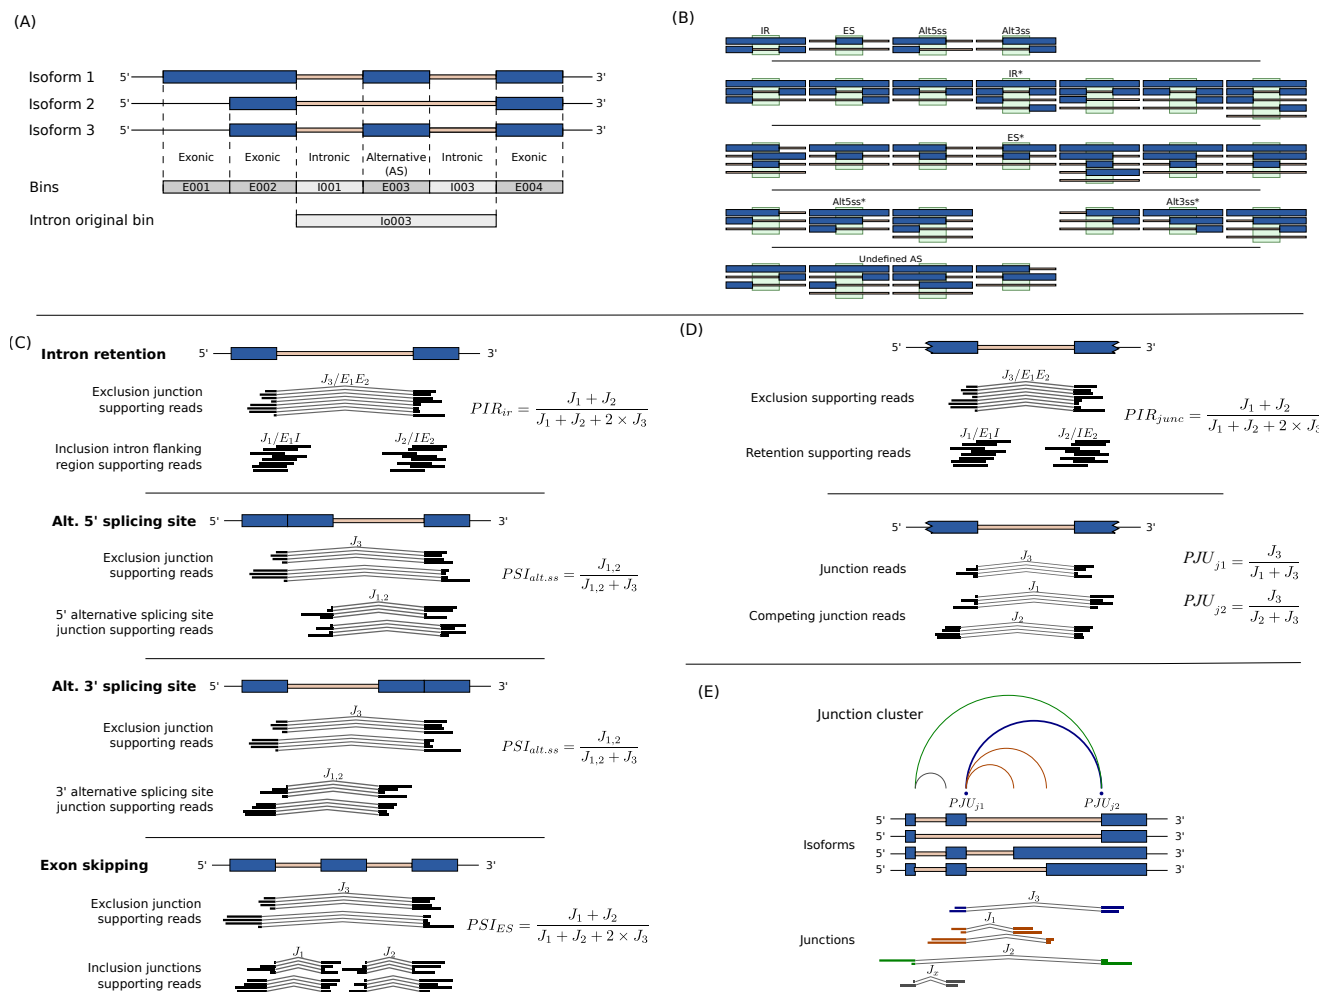

Figure (S8) Panel (A) shows how bin-features are defined and classified as: exonic, intronic or intron\_original bins using genome annotation. The local splicing classification scheme is illustrated in panel (B). The definition of PSI and PIR metrics for bin features are pictured in panel (C). Definition of junction PIR and PJU statistics are shown in panel (D). Panel (E) shows a possible junction cluster and highlights the definition of type  $J_1$ ,  $J_2$  and  $J_3$  junctions for the analysis of PJU statistics for the blue junction.

826 regions used to identify and quantify intron retention events. Reads corre-  
827 sponding to annotated junctions are also tallied, along with genomic relevant  
828 information such as identity of spanned bins, and the existence of possible  
829 *exintrinsic* events [? ].

### 830 8.1.3. *De-novo junction counting: jCounts()*

831 ASpli takes advantage of experimentally detected splice junctions to per-  
832 form two different type of analysis. For one hand, junction data is considered  
833 in order to provide junction support to AS events detected through bin cov-  
834 erage analysis. For the other, it is used to quantify novel splicing events.

835 *Junction support of bin coverage statistics:*. ASpli makes use of junction data  
836 as supporting evidence of alternative usage of bins. For a general differential  
837 splicing event affecting a given bin, it is always possible to define exclusion  
838 and inclusion junctions. The first class of junctions (noted as  $J_3$ ) pass over  
839 the bin of interest, whereas the second ones (note as  $J_1$  and/or  $J_2$ ) quantify  
840 and support the inclusion of start and/or end bin boundaries in the mature  
841 transcript. Panel C of Figure S8 illustrates this point for the different types of  
842 splicing events that could affect a given bin. ASpli considers for this analysis  
843 junctions that are completely included within a unique gene and have more  
844 than a minimum number of reads supporting them (by default this number  
845 is five).

846

847 PSI (percent spliced in) [45] and PIR (percent of intron retention) metrics  
848 are two well known statistics that can be used to quantify the relative weight  
849 of inclusion evidence for different kind of splicing events (see Panel C of

850 Figure S8). For each bin, ASpli quantifies the inclusion strength in every  
 851 experimental condition using the appropriate inclusion index (see Table S1).  
 852 Only junctions that pass an abundance filter criterium (a minimum number  
 853 of counts should be attained in all samples of at least one condition) are  
 854 considered for the estimations.

| feature  | assesment | index          | bin class                                        |
|----------|-----------|----------------|--------------------------------------------------|
| bin      | inclusion | $PIR_{ir}$     | UAS, I, I*, I <sub>0</sub>                       |
|          |           | $PSI_{es}$     | $\frac{J_1+J_2}{J_1+J_2+2*J_3}$<br>UAS, E, E*    |
|          |           | $PSI_{alt5ss}$ | $\frac{J_{1,2}}{J_{1,2}+J_3}$<br>Alt5ss, Alt5ss* |
|          |           | $PSI_{alt3ss}$ | Alt3ss, Alt3ss*                                  |
| junction | usage     | $PIR_{junc}$   | $\frac{J_1+J_2}{J_1+J_2+2*J_3}$<br>-             |
|          |           | $PJU_{J_1}$    | $\frac{J_3}{J_1+J_3}$<br>-                       |
|          |           | $PJU_{J_2}$    | $\frac{J_3}{J_2+J_3}$<br>-                       |

Table (S1) Junction usage and inclusion strength figure of merits for different bin classes and for experimentally detected junctions. The definition of  $J_1$ ,  $J_2$  and  $J_3$  junction counts is depicted in panels C and D of Figure S8 for annotated and experimentally detected junctions respectively.

855 For each bin, a PIR or a PSI metric is calculated, according to the splicing  
 856 event category assigned to that bin (see last column of table S1). If no splice  
 857 event was assigned, meaning that the bin is not alternative, an exon will be  
 858 considered to be involved in a putative exon skipping splicing event, and an  
 859 intron will be considered to be involved in a putative intron retention splicing  
 860 event.

861 *Novel and non-canonical splicing patterns:*. ASpli relies on the direct analysis  
862 of experimentally observed splicing junctions in order to study novel (i.e.  
863 non-annotated) splicing patterns.

864 For every experimental junction, ASpli characterizes local splicing pat-  
865 terns considering two hypothetical scenarios. For one hand, assuming that  
866 every detected junction might be associated to a possible intron that could  
867 be potentially retained, a  $PIR_{junc}$  value is computed (panel D of Figure S8).

868

869 On the other hand, every junction also defines potential 5' and 3' splic-  
870 ing sites. It can be the case that one (in an alternative 5' or 3' scenario),  
871 or both ends (in case of exon skipping) were shared by other junctions. In  
872 this context, it is informative to characterize the relative abundance of the  
873 analyzed junction (dubbed  $J_3$ ) with respect to the locally *competing* ones.  
874 ASpli estimates *percentage junction-usage* indices,  $PJU_{J_1}$  and  $PJU_{J_2}$ , in or-  
875 der to evaluate and quantify this quantities (see Panel D of figure S8 and  
876 Table S1). In order to illustrate this point, we show in Panel E of figure S8  
877 an hypothetical splicing scenario for a given junction of interest,  $J_3$ . It can  
878 be appreciated that  $PJU_{J_1}$  quantifies the participation of this junction in  
879 the context of a splicing pattern involving the two orange competing junc-  
880 tions, whereas  $PJU_{J_2}$  reports on the usage of  $J_3$  in connection with the green  
881 competing junction.

## 882 8.2. *Command-line running arguments*

883 Command lines used to invoked algorithms and further calculation details:

884

885 • STAR aligner

886 For PRMT5 datasets

```
887 1 | $ STAR --runThreadN 30 --genomeDir TAIR10_GENOME_DIR --twopassMode
888     Basic --outSAMtype BAM SortedByCoordinate --
889     outFilterMultimapNmax 2 --outFilterType BySJout --
890     outSJfilterReads Unique --sjdbOverhang PARAM --
891     alignSJoverhangMin 6 --alignSJDBoverhangMin 3 --alignIntronMin
892     20 --alignIntronMax 5000 --readFilesIn ../01_FASTQ/Col_3_1.fq ..
893     /01_FASTQ/Col_3_2.fq --outFileNamePrefix Col_3/Col_3
```

894 We used a `sjdbOverhang` parameter value equal to 99 and 149 for  
895 PRMT5 datasets A and B respectively.

896

897 For the prostate dataset we aligned using default STAR parameters.

```
898 1 | $ STAR --runThreadN 30 --genomeDir ENSEMBL_HG38_PATH --
899     readFilesCommand zcat --twopassMode Basic --outSAMtype BAM
900     SortedByCoordinate --sjdbOverhang 89 --readFilesIn 1.fq 2.fq
```

901 We used a `sjdbOverhang` parameter value equal to 99 and 149 for  
902 PRMT5 datasets A and B respectively.

903 • LeafCutter (synthetic dataset)

904 BAM files were first processed using the provided `bam2junc.sh` script.

905 The generated `juncfiles.txt` was then used to build junction clusters via  
906 the provided python script

```
907 1 | $ python PATH leafcutter_cluster.py -j juncfiles.txt -m 30 -l 500000
```

908 Finally, we used the provided `leafcutter_ds` R-script to run the statistical  
909 analysis (`min_samples_per_intron=3`).

910 • rMATS Command line use to analyzer PRMT5 assays:

```
911 | 1 rMATS.4.0.2/rMATS-turbo-Linux-UCS4/rmats.py --b1 bam_prmt5.txt --b2  
912 |     bam_col.txt --gtf /data1/genomeData/ath/Ensembl_illumina_iGenomes/  
913 |     TAIR10/Annotation/Genes/genes.gtf --od r1150 -t paired --nthread  
914 |     20 --readLength 150 --tstat 10
```

#### 915 • MAJIQ

### 916 8.3. Splicing affected regions detected by different algorithms

917 Each algorithm reports splicing altered genomic features in different ways.  
918 In order to standardize the identification of regions of interest we proceeded  
919 as follows:

- 920 • LeafCutter: We first identified clusters presenting adjusted pvalues <  
921 0.05 as reported in 'leafcutter\_ds\_cluster\_significance.txt' file. For each  
922 of these statistically significant clusters we considered the associated  
923 genomic-regions reported in 'leafcutter\_ds\_effect\_size.txt' file with  $|\Delta\Psi| >$   
924 0.1.
- 925 • MAJIQ: We considered the genomic-region covering junction clusters  
926 presenting at least one junction with  $P(|\Delta\Psi| > 0.2) > 0.95$ .
- 927 • rMATS: We considered the values reported in 'JCEC.txt' files. This  
928 means that we considered a model that evaluated splicing with reads  
929 that spanned splicing junctions and reads on targets bins (i.e. alterna-  
930 tively spliced exons). We kept junctions presenting adjusted FDR < 0.0  
931 and inclusion signal larger than a 0.1 level. Genomic regions were then  
932 defined according the following rules:

- 933 – A3SS' (A3SS.MATS.JCEC.txt file): We considered the genomic  
934 region between 'shortEE' and 'longExonEnd' coordinates for neg-  
935 ative strand and by 'longExonStart\_0base' and 'shortES' for pos-  
936 itive strand cases.
- 937 – A5SS' (A5SS.MATS.JCEC.txt file): We considered the genomic  
938 region between 'shortEE' and 'longExonEnd' coordinates for pos-  
939 itive strand and by 'longExonStart\_0base' and 'shortES' for neg-  
940 ative strand cases.
- 941 – MXE (MXE.MATS.JCEC.txt file): We considered two regions  
942 per event defined by: '1stExonStart\_0base', '1stExonEnd' and  
943 '2ndExonStart\_0base', '2ndExonEnd'.
- 944 – SE (SE.MATS.JCEC.txt file): We considered the regions between  
945 'exonStart\_0base' and 'exonEnd'.
- 946 – RI (RI.MATS.JCEC.txt file): We considered the regions between  
947 'riExonStart\_0base' and 'riExonEnd'.

#### 948 *8.4. Analysis of false positive calls in simulated dataset*

949 In our simulations a 20% level of random variability was added to variant  
950 concentration profiles. A splicing activation signal (SAS) value was then es-  
951 timated for each gene as the maximum absolute change in variant concentra-  
952 tion observed between conditions. The left-most first and second boxplots in  
953 Figure S9 depict the distribution of this quantity for the 915 genes for which  
954 a splicing event was simulated, and for the remaining 7518 genes respectively.  
955 On the other hand, the four right-most boxplots show the SAS distribution  
956 for false positive calls obtained with different methods. Non explicitly splic-

957 ing simulated changes were reported for 9, 4, 48 and 23 genes according to  
958 ASpli, LeafCutter, MAJIQ and rMATS algorithms respectively.

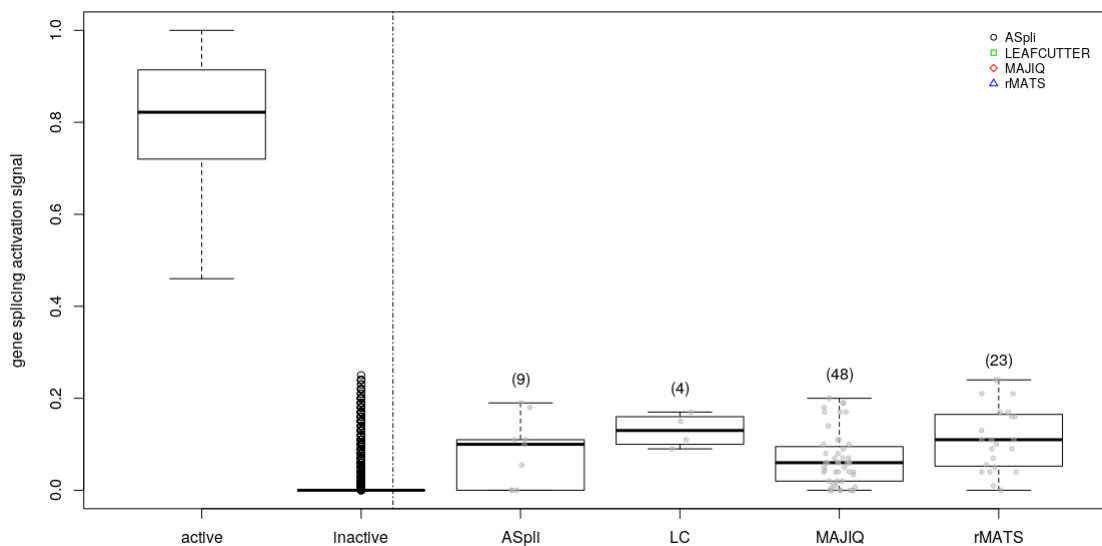

Figure (S9) Splicing simulation.

### 959 8.5. Comparison of discoveries

960 A comprehensive comparison of discoveries appeared at first-sight prob-  
961 lematic as each algorithm is focused on different genomic features in order  
962 to chart splicing landscapes.

963 For instance, rMATS analyzes genomic regions flanked by upstream and  
964 downstream exons to examine canonical splicing events. MAJIQ and Leaf-  
965 Cutter, on the other hand, exclusively rely on clusters of split reads that  
966 share start or ending junction-ends. Finally ASpli considers both, junction  
967 clusters and bin features, i.e. genomic regions defined from disjoint ranges  
968 of annotated junctions.



969 In this context, a first coarse grained comparison could be established at  
970 gene-level, comparing the identity of genes housing splicing-altered patterns  
971 according to the different analyzed methods. Panel (A) of Figure S10 dis-  
972 plays a color-coded overlap matrix of affected genes in experiments *A* and *B*  
973 according to the four examined methodologies. Each cell reports the inter-  
974 section size and, in brackets, the corresponding overlap coefficient. At gene  
975 level, rMATS achieved the largest agreement factor (83% of genes identified  
976 in experiment *B*, were also reported in experiment *A*). However, it also  
977 produced the lowest number of discoveries (119). ASpli, on the other hand,  
978 presented a comparable level of agreement (71%), highlighting a significa-  
979 tively larger number of concordant genes (2109). Typically, more than 50%  
980 of genes identified by any methodology was also reported by ASpli (first and  
981 second rows of Figure S10). Moreover, the number of concordant discoveries  
982 between experiments considering a given methodology was comparable to the  
983 agreement level achieved between each experiment-methodology combination  
984 and the corresponding ASpli result. Noticeably, more than 90% of MAJIQ's  
985 genes were also spotted by ASpli.

986

987 A more in-depth comparison could be established analyzing the overlap  
988 of identified genomic regions. In panels (b) and (c) of Figure S10 we informed  
989 the extent of the overlaps between genomic regions found to be affected by  
990 differential splicing patterns according to each algorithm (see Material and  
991 Methods 3.5) to map events reported by each method to a common set of  
992 genomic coordinates). While any kind of overlap was registered for panel (b),  
993 only complete inclusion of genomic regions identified by one method inside

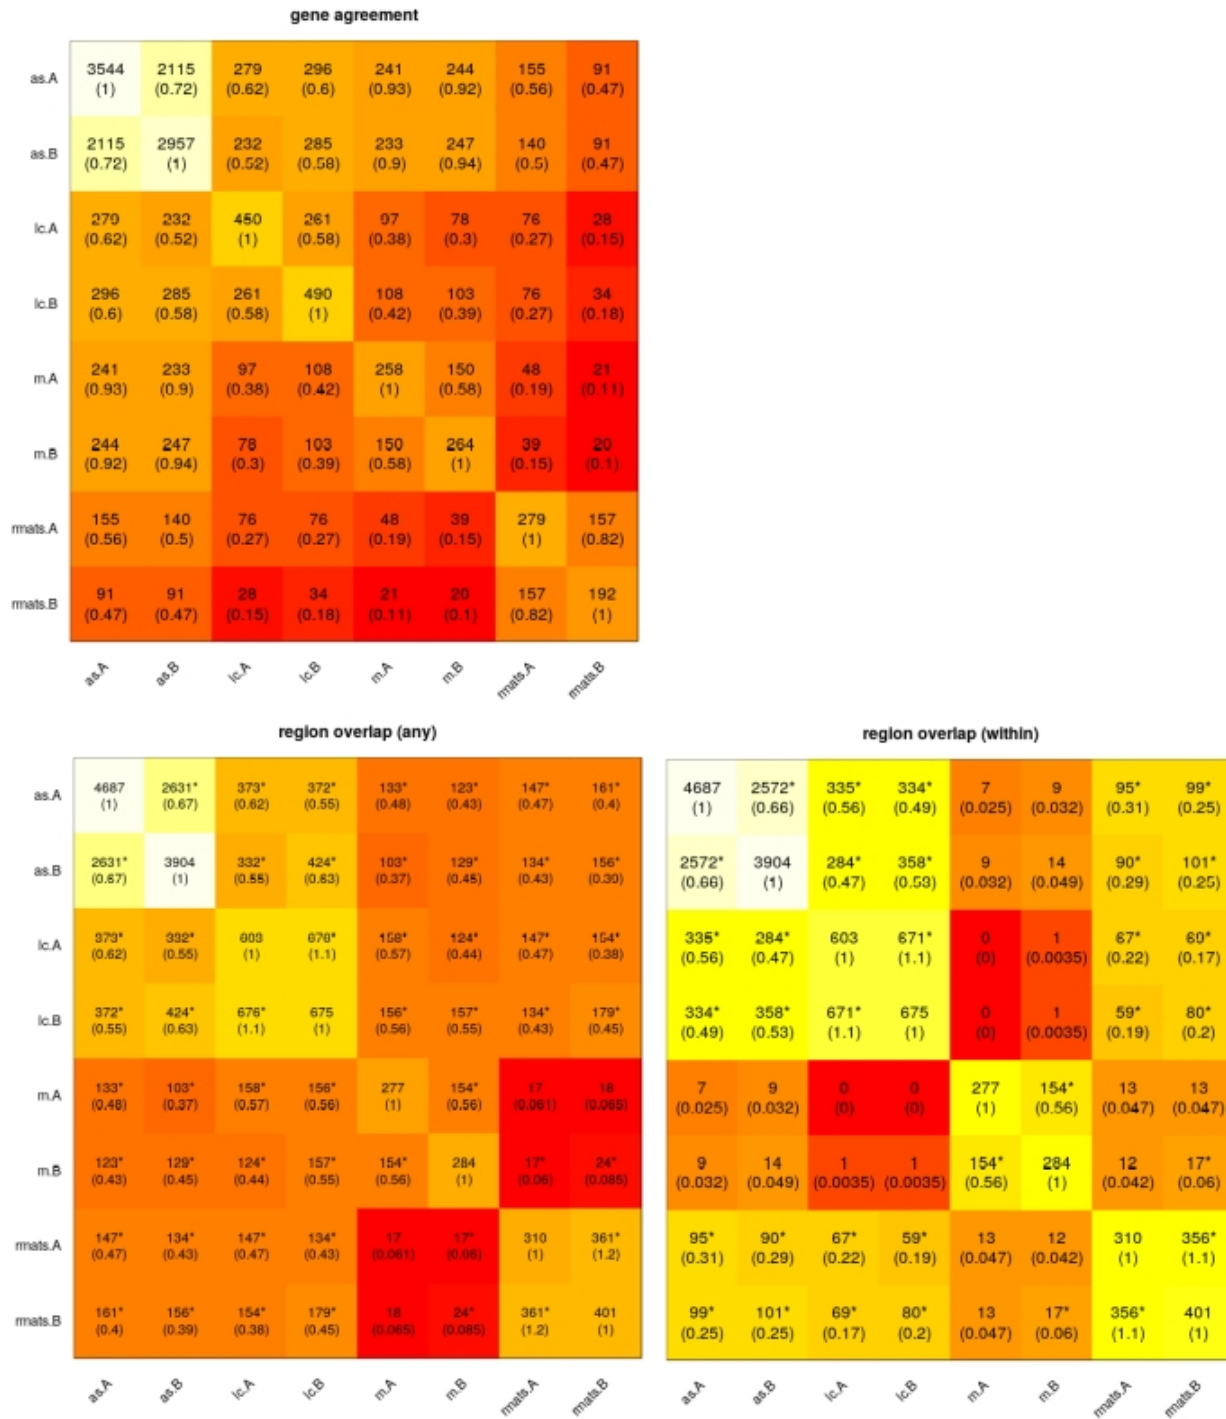

Figure (S10) ASpli main functions.

994 the ones identified by a second one was considered for panel (c). Statistically  
995 significant overlaps were marked with asterisks. Note that overlap coefficients  
996 (in brackets) exceeding unity were detected in between-experiments compar-  
997 isons for LeafCutter and rMATS as a result of the presence of one-to-many  
998 region mappings.

999 For the loose overlap criterium we found statistically significant concor-  
1000 dance between discoveries for almost every cell (Fig S10-b). Only specific  
1001 comparisons involving MAJIQ and rMATs failed the statistical significance  
1002 test. At the same time, overlap coefficient values were similar to the ones  
1003 estimated at the gene-level analysis. Noticeably, we recognised a sensible  
1004 reduction in this quantity for the MAJIQ vs ASpli comparison. This finding  
1005 highlighted that gene-level agreement should in general be considered with  
1006 caution. A more detailed examination at the sub-genic level might be neces-  
1007 sary to assess for discovery consistencies between algorithms. Results for the  
1008 most stringent overlap criterion are shown in Figure S10(c). As expected,  
1009 a major decrease on overlap coefficient values was observed . However, sta-  
1010 tistically significant agreement between results was still found as a general  
1011 rule. Only comparisons involving MAJIQ's discoveries failed the statistical  
1012 assessments.

1013

#### 1014 *8.6. PRMT5 PCR events*

1015 We characterized the agreement between the 23 splicing events that AS-  
1016 pli uncovered for the consolidated AB case, and the 44 Sanchez qRT-PCR  
1017 validated events in Table S2. For each assayed event we included the kind  
1018 of the original event and the reported qRT-PCR splicing signal value in the

1019 second and third columns respectively (Sanchez and collaborators calculated  
1020 the fraction of the shortest isoform in PRMT5 mutants and wildtype plants  
1021 detected by qRT-PCR, and used the relativized difference between them as  
1022 a quantitative proxy of splicing changes (Table 4 of [25])). In the fourth col-  
1023 umn we informed whether the PCR-interrogated genomic region overlapped  
1024 with the one signaled by ASpli. Finally, the type of splicing event detected  
1025 by ASpli was included in the last column of the table.

#### 1026 *8.7. Prostate cancer dataset: Transcriptomic variability*

1027 In order to visualize the transcriptomic variability across patients at gene  
1028 expression levels we considered the 30% most variable genes across the 28  
1029 expression profiles that presented more than 10 counts per million reads  
1030 in at least 3 samples. With this informative set of 1386 genes we built a  
1031 multidimensional scaling plot of distances between gene expression profiles  
1032 estimated with the edgeR package [24]. Results are shown in Fig S11. In this  
1033 kind of plot, samples lay on a two-dimensional scatterplot so that distances  
1034 on the plot approximate the typical log<sub>2</sub> fold changes between the samples  
1035 (function plotMDS of edgeR [24]).

1036 Empty and filled symbol correspond to tumor and normal tissue samples  
1037 respectively. Pair of points of a given patient are equally colored and joined  
1038 by a dashed edge.

1039 It can be seen that tumor and normal samples were well separated across  
1040 the leading reduced dimension. The second largest projected dimension,  
1041 however, let us appreciate internal structure and some variability between  
1042 patients. There was a group of 5 patients (top left empty points) that dis-  
1043 played a rather homogeneous pattern of changes between tumor affected and

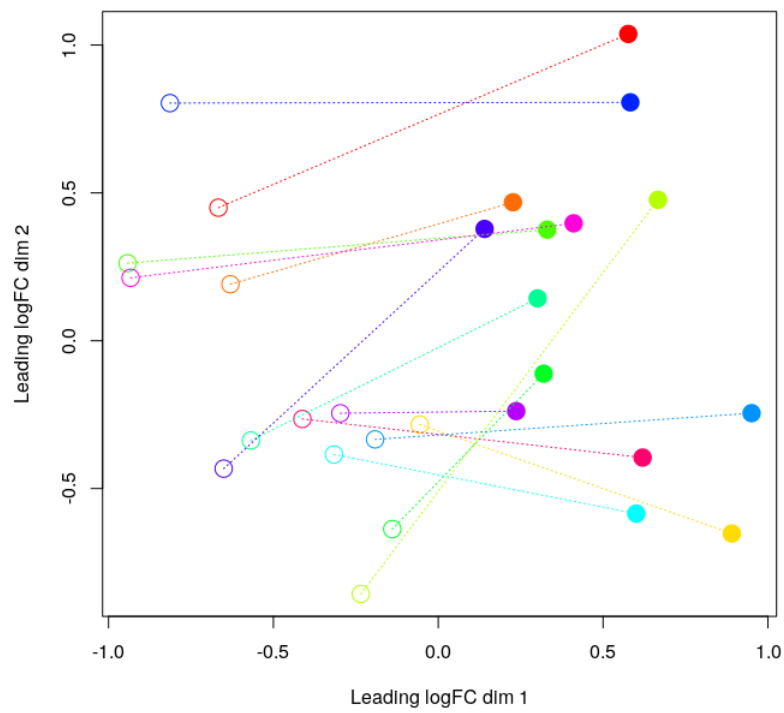

Figure (S11) A.

1044 normal tissues. On the contrary, the 9 bottom-left tumor samples seemed  
1045 to segregate into a different cluster of transcriptomes. Moreover, the corre-  
1046 sponding patients presented different kinds of alterations between tumor and  
1047 control samples.

|    | Gene ID   | Event   | qRT-PCR signal | Region overlap | Detected event                     |
|----|-----------|---------|----------------|----------------|------------------------------------|
| 1  | AT1G53650 | 5'ss    | 18.93          | yes            | IR (next to 5)                     |
| 2  | AT1G54360 | 5'ss    | 39.21          | yes            | Alt5ss                             |
| 3  | AT1G76510 | 5'ss    | -28.00         | yes            | Alt5ss                             |
| 4  | AT2G04790 | 5'ss    | 11.14          | yes            | IR                                 |
| 5  | AT2G15530 | 5'ss    | 21.12          | yes            | Alt 5'/3'                          |
| 6  | AT2G33480 | 5'ss    | -27.16         | yes            | IR                                 |
| 7  | AT2G38880 | 5'ss    | -10.44         | no             | IR                                 |
| 8  | AT2G46790 | 5'ss    | 35.20          | yes            | Alt5ss (plus additional IR)        |
| 9  | AT3G01150 | ES      | -13.70         | no             | IR                                 |
| 10 | AT3G12250 | 5'ss    | -16.29         | no             | ES*                                |
| 11 | AT3G16800 | IR/3'ss | -31.59         | yes            | IR, Novel Alt 5'/3'                |
| 12 | AT3G19840 | 5'ss    | -26.20         | no             | IR                                 |
| 13 | AT3G20270 | ES      | 8.51           | no             | IR (next to ES)                    |
| 14 | AT3G23280 | ES      | 18.21          | yes            | ES                                 |
| 15 | AT3G25840 | ES      | 6.51           | yes            | ES                                 |
| 16 | AT4G02430 | 3'ss    | 27.45          | no             | IR                                 |
| 17 | AT4G24740 | ES      | 16.07          | no             | IR (next to ES)                    |
| 18 | AT4G31720 | 3'ss    | 12.37          | no             | IR                                 |
| 19 | AT4G32730 | 5'ss    | 30.93          | yes            | Novel Alt 5'/3'                    |
| 20 | AT4G38510 | 5'ss    | 15.53          | yes            | Alt5ss*, CSP                       |
| 21 | AT5G05550 | ES      | 32.72          | yes            | ES (plus additional IR)            |
| 22 | AT5G25610 | IR      | -71.69         | yes            | IR                                 |
| 23 | AT5G57630 | 5'ss    | 31.07          | yes            | Novel Alt 5'/3' (plus adjacent IR) |

Table (S2)
